# 1 **The annotation and analysis of complex 3D plant organs using**

## 2 **3DCoordX**

3

4 Athul Vijayan<sup>1,#a,¶</sup>, Soeren Strauss<sup>2,¶</sup>, Rachele Tofanelli<sup>1</sup>, Tejasvinee Atul Mody<sup>1</sup>, Karen  
5 Lee<sup>3</sup>, Milto Tsiantis<sup>2</sup>, Richard S. Smith<sup>2,3</sup> and Kay Schneitz<sup>1,\*</sup>

6 <sup>1</sup>Plant Developmental Biology, TUM School of Life Sciences, Technical University of  
7 Munich, Freising, Germany

8 <sup>2</sup>Department of Comparative Developmental and Genetics, Max Planck Institute for Plant  
9 Breeding Research, Cologne, Germany

10 <sup>3</sup>The John Innes Centre, Norwich Research Park, Norwich, United Kingdom

11 <sup>#a</sup>Current address

12 Department of Comparative Developmental and Genetics, Max Planck Institute for Plant  
13 Breeding Research, Cologne, Germany

14

15 <sup>\*</sup>Corresponding author

16 Email: [kay.schneitz@tum.de](mailto:kay.schneitz@tum.de) (KS)

17

18 <sup>¶</sup>These authors contributed equally to this work.

19

20 Short title: Computational cell annotation in 3D digital plant organs

21

22 Email addresses authors:

23 Athul Vijayan: [avijayan@mpipz.mpg.de](mailto:avijayan@mpipz.mpg.de)

24 Soeren Strauss: [strauss@mpipz.mpg.de](mailto:strauss@mpipz.mpg.de)

25 Rachele Tofanelli: [r.tofanelli@tum.de](mailto:r.tofanelli@tum.de)

26 Tejasvinee Atul Mody: [t.mody@tum.de](mailto:t.mody@tum.de)

27 Karen Lee: [karen.lee@jic.ac.uk](mailto:karen.lee@jic.ac.uk)

28 Milto Tsiantis: [tsiantis@mpipz.mpg.de](mailto:tsiantis@mpipz.mpg.de)

29 Richard Smith: [Richard.Smith@jic.ac.uk](mailto:Richard.Smith@jic.ac.uk)

30 Kay Schneitz: [kay.schneitz@tum.de](mailto:kay.schneitz@tum.de)

31

32

33

## 34 **Abstract**

35 A fundamental question in biology concerns how molecular and cellular processes  
36 become integrated during morphogenesis. In plants, characterization of 3D digital  
37 representations of organs at single-cell resolution represents a promising approach to  
38 addressing this problem. A major challenge is to provide organ-centric spatial context to  
39 cells of an organ. We developed several general rules for the annotation of cell position  
40 and embodied them in 3DCoordX, a user-interactive computer toolbox implemented in  
41 the open-source software MorphoGraphX. It enables rapid spatial annotation of cells even  
42 in highly curved biological shapes. With the help of 3DCoordX we obtained new insight  
43 by analyzing cellular growth patterns in organs of several species. For example, the data  
44 indicated the presence of a basal cell proliferation zone in the ovule primordium of  
45 *Arabidopsis thaliana*. Proof-of-concept analyses suggested a preferential increase in cell  
46 length associated with neck elongation in the archegonium of *Marchantia polymorpha*  
47 and variations in cell volume linked to central morphogenetic features of a trap of the  
48 carnivorous plant *Utricularia gibba*. Our work demonstrates the broad applicability of the  
49 developed strategies as they provide organ-centric spatial context to cellular features in  
50 plant organs of diverse shape complexity.

51

## 52 **Introduction**

53 It remains a salient challenge to understand the generation of biological shape. Gaining  
54 comprehensive insight into the multi-scale processes underlying morphogenesis critically  
55 depends on the quantitative description of molecular, cellular, and tissue-level  
56 parameters, such as gene and protein expression, cell geometry, and cell topology

57 [1–6]. Moreover, as prominently proposed by D’Arcy Thompson, the generation of shape  
58 can be achieved by growth that is oriented relative to a coordinate system imposed on the  
59 organ [7]. Thus, insight into tissue morphogenesis further relies on putting cellular data  
60 into context by placing them within an organ-related frame of reference [8–11].

61

62 Realistic 3D digital organs with cellular resolution have become indispensable tools for  
63 the study of morphogenesis. They can be obtained by deep imaging of fluorescently  
64 marked specimens using for example confocal laser scanning microscopy (CLSM) or  
65 light sheet fluorescence microscopy (LSFM) followed by 3D cell segmentation of the  
66 obtained z-stacks of optical sections with the help of constantly improving software [11–  
67 17]. Tissues and organs of model plants are particularly well suited for the generation of  
68 such 3D digital representations. Plant cells are immobile simplifying the detection of  
69 cellular growth patterns associated with tissue formation. In addition, plant tissues are  
70 characterized by a small number of different cell types and often exhibit a well-structured,  
71 layered organization. Thus, they usually feature a cellular anatomy of manageable  
72 complexity. Accordingly, a growing number of realistic 3D digital tissues with cellular  
73 resolution are being generated, mainly in the model plant *Arabidopsis thaliana* [9,10,18–  
74 27].

75

76 With the help of 3D digital organs quantitative information about geometric and  
77 molecular parameters of up to thousands of cells can readily be obtained using open-  
78 source software, such as MorphoGraphX [11,14] (preprint). However, meaningful  
79 exploration of such complex data sets remains challenging. In particular, it is important to  
80 provide spatial context by placing the cell’s data within an organ-related frame of  
81 reference [8]. Several computational pipelines have been established that provide such a

82 tissue-level frame of reference and allow the semi-automatic annotation of 3D cellular  
83 properties in a plant tissue context with cellular resolution: iRoCS [9], 3DCellAtlas [10],  
84 and 3DCellAtlas Meristem [22]. These computational pipelines have been applied very  
85 successfully for the annotation of cells and tissues in the main root and the hypocotyl,  
86 radially symmetric organs with limited curvature, or the SAM, a dome-shaped structure  
87 exhibiting an anatomy of moderate complexity. However, not all plant organs fall into  
88 these simple morphogenetic categories. For example, strong curvature caused by  
89 developmentally regulated differential growth limits the usefulness of the implemented  
90 analytical strategies in iRoCS and 3DCellAtlas, particularly for indexing the axial  
91 position of a cell and determining its absolute distance to a reference. Yet, curvature  
92 represents a central element of the morphogenesis of plant organs with complex 3D  
93 shapes [28]. Many plant organs exhibit varying degrees of curvature, for example the  
94 apical hook of seedlings, leaves, or floral organs, such as sepals or petals. The ovule, the  
95 major female reproductive organ in higher plants, constitutes a particularly prominent  
96 example. Ovules are characterized by complex anatomy consisting of a central “trunk”,  
97 made up of several functionally distinct tissues stacked on top of each other, and by one  
98 or two laterally attached integuments, determinate planar tissues that eventually develop  
99 into the seed coat [29]. Moreover, most angiosperm ovules exhibit an extreme curvature  
100 due to asymmetric growth of the integuments [30].

101

102 Here, we used the ovule of *Arabidopsis thaliana* as a model to develop new generic  
103 strategies, implemented in MorphoGraphX, that allow the straightforward establishment  
104 of intrinsic coordinate systems in organs of simple or elaborate shapes. To this end we  
105 took advantage of a recently generated digital 3D reference atlas of ovule development in  
106 *Arabidopsis* [27]. We illustrate how such a coordinate system enables rapid annotation of

107 cell identity and cell position in 3D and greatly facilitates the quantitative analysis of  
108 cellular features. We applied our strategies to an investigation of cell proliferation  
109 patterns in the ovule primordium and the cellular basis of differential integument growth.  
110 Finally, we demonstrate the broad applicability of the introduced concepts by providing  
111 proof-of-concept analysis for selected parameters in different plant organs of varying  
112 shape complexity.

113

## 114 **Results**

### 115 **Curvature-related complications in the assignment of axial** 116 **position**

117 The analytical strategies for the positional annotation of individual cells relative to tissue  
118 organization depend on the structure under study. For example, the straightforward  
119 approaches employed in iRoCS and 3DCellAtlas involve cylinder coordinates and work  
120 very well for indexing axial position of cells relative to a reference in the root or  
121 hypocotyl, structures exhibiting limited curvature (Fig. 1A). However, asymmetric  
122 growth caused by differential cell proliferation and/or cell expansion can result in slanted  
123 or highly curved organs. In these instances, such approaches may lead to cells of the same  
124 indexed position having different absolute axial distances to a common reference (Fig.  
125 1B). Thus, we devised a different strategy to minimize such axial distance errors when  
126 assigning 3D positional annotation to cells of organs that exhibit complex shapes. Our  
127 approach takes cues from central patterning events that frequently occur during early  
128 plant organogenesis, in particular the distinction of radial layers, the subdivision into  
129 anterior-posterior domains, and the establishment of a proximal-distal (axial) distance  
130 field (Fig. 1C,D). The proximal-distal distance of a cell relative to a user-defined

131 reference is estimated by finding the shortest path through the cell centroids. Importantly,  
132 the search is confined to a given tissue layer and may not cross the anterior-posterior  
133 domain. The restriction to a tissue layer removes a large part of the axial distance error as  
134 the shortest path through the tissue layers cannot extend through interior tissues (Fig. 1C).  
135 On top of this restriction, prohibiting the shortest path from passing the anterior-posterior  
136 boundary further minimizes the error (Fig. 1D).

137

## 138 **Development of the Arabidopsis ovule**

139 The typical angiosperm ovule represents a prime example of an elaborately curved  
140 structure. Ovule development in *Arabidopsis thaliana* is well described [24,27,31,32]  
141 (Fig. 2A,B). During stage 1 the ovule emerges as a finger-like protrusion from the  
142 placenta (staging according to [27,32]). Eventually, three elements can eventually be  
143 recognized along the trunk of the developing ovule: the nucellus at its tip, the chalaza in  
144 the center, and the funiculus at the bottom. The nucellus generates the large sub-  
145 epidermal megaspore mother cell (MMC) that will undergo meiosis during stage 2.  
146 During stage 3 one of the meiotic products eventually develops into the haploid embryo  
147 sac or female gametophyte carrying the egg cell proper. The chalaza is characterized by  
148 two epidermally-derived integuments, lateral tissues that initiate from its flanks during  
149 stage 2. The outer integument represents a bilayered structure while the inner integument  
150 eventually consists of three cell layers. The two integuments grow around the nucellus but  
151 leave open a small cleft, the micropyle, through which the pollen tube can reach the  
152 embryo sac. The funiculus, a stalk-like structure, harbors the vascular strand and connects  
153 the ovule to the placenta. The mature Arabidopsis ovule features an elaborately curved  
154 shape. Curvature is caused in part by the integuments bending around the nucellus during  
155 stage 3 until their tips eventually locate next to the funiculus (anatropy). In addition, the

156 funiculus forms a bend as well. Overall, the mature ovule exhibits a characteristic doubly-  
157 curved structure (Fig. 2A).

158

## 159 **Developmental axes of the ovule primordium**

160 The Arabidopsis ovule primordium exhibits the typical radial organization into the L1,  
161 L2, and L3 cell layers [33,34]. In addition, the distal nucellus, central chalaza, and  
162 proximal funiculus, represent three proximal-distal pattern elements along the trunk of the  
163 developing ovule. Gene expression patterns underlying the proximal-distal organization  
164 of the primordium are relatively well understood [27,35,36]. Importantly, the early  
165 primordium is not growing in a straight fashion but rapidly adopts a slant relative to the  
166 placenta surface, with the small angle of the slant facing the septum. It represents the first  
167 morphological sign of an anterior-posterior polarity (Fig. 1C,D) [27]. The presence of an  
168 anterior-posterior axis is further supported by the anterior expression of the class III HD-  
169 ZIP gene *PHABULOSA* in the early primordium [37]. To corroborate the establishment of  
170 an anterior-posterior axis in the stage 1-I ovule primordium we investigated the spatial  
171 signal distribution of pKAN1::KAN1:2xGFP, a reporter for *KANADII* expression [38].  
172 We observed detectable signal exclusively in the epidermis of the posterior ovule  
173 primordium (Fig. 2C). Interestingly, we did not detect expression in the tip of the  
174 primordium. By stage 2-I reporter signal appeared to be restricted to the posterior  
175 epidermis of the prospective funiculus.

176

177 In summary, the combined evidence strongly suggests the establishment of a radial, a  
178 proximal-distal, and an anterior-posterior axis in the ovule primordium. At the same time,  
179 the slant represents an early morphological manifestation of the ovule becoming a curved  
180 structure.

181

182 **Cell layer detection, individual organ separation, and anterior-**  
183 **posterior domain annotation in 3D**

184 The annotation of cell position in 3D in the slanted ovule primordium required the  
185 application of the general principles outlined above. To be able to do so in a fast and  
186 robust manner we devised a new method for radial tissue labeling. Current pipelines, such  
187 as 3DCellAtlas and 3DCellAtlas Meristem, invoke a surface mesh as a central tool for  
188 cell and tissue annotation in the root, hypocotyl, and the SAM [10,22]. However,  
189 establishing a surface mesh does not work well in situations where organs are in close  
190 contact with each other as is often the case for young ovule primordia attached to the  
191 placenta (Fig. 3A). The resulting individual surface meshes fail to outline the surfaces of  
192 the cells in contact and it is labour intensive to recreate a surface mesh in such instances.

193

194 To address this problem, we developed a new strategy to perform automatic layer  
195 detection that groups cells into L1, L2, and L3 without a need for a surface mesh (Fig.  
196 3A-C). In a first step L1 cells are clustered on the basis of a cell at the outer surface of the  
197 organ not being flanked by a neighboring cell at their outer surface. This feature is  
198 captured by defining the ratio of unshared wall area to shared wall area of individual cells  
199 (outside wall area ratio). Once L1 cells are clustered, L2 and L3 cells are found by their  
200 relative distances to the L1 cells. To this end a network of cell centroids is established and  
201 the shortest number of centroids a cell must cross to reach to the nearest L1 cell is  
202 determined. The corresponding result essentially reveals how many cells separate the cell  
203 of interest from the L1. The information can be directly used to cluster cells into L2 and  
204 L3 as L2 cells are direct neighbors of L1 cells and L3 cells are separated from the L1 by  
205 more than one cell. The strategy does not completely solve the issue when surface cells of



206 neighboring organs are in full contact. However, the process works well when there is  
207 partial contact that still leaves behind a significant outside unshared cell wall area. This  
208 approach successfully annotated the radial tissue layers in ovule primordium or the shoot  
209 apical meristem (Fig. 3A-C, Fig S1).

210

211 Another problem relates to the separation of the multiple ovule primordia attached to the  
212 placenta into distinct units to allow ovule-specific analyses. We devised a method that  
213 takes advantage of the cell connectivity graph (Fig. 3D). From a selected cell at the distal  
214 end on each different ovule, distances to all other cells on the cell connectivity graph are  
215 computed. Cells are then assigned a label based on their nearest selected cell on that  
216 graph. A further parameter sets a maximum size of the ovules (in number of cells from  
217 the selected cells) to separate the ovules from their surrounding tissue. To facilitate  
218 downstream analysis, different labeling types, such as the cell layers and the ovule labels,  
219 are combined to create a unique label for each layer in every ovule.

220

221 In the last step, cells of anterior and posterior domains of about similar dimensions are  
222 obtained by manual selection (Fig. 3E). For the funiculus we also devised a semi-  
223 automatic method to distinguish the anterior and posterior domains (Fig. S2). In  
224 summary, the outlined approaches enable the generation of 3D digital ovule primordia of  
225 separate identities and near-perfect radial and anterior-posterior tissue annotation with  
226 minimal user input.

227

## 228 **Assignment of proximal-distal position to individual cells in 3D**

229 To determine the proximal-distal (axial) position of an ovule primordium cell we  
230 generated a method that applies to 3D digital ovules for which radial cell layers and the

231 anterior-posterior domains have already been annotated. The proximal-distal position of  
232 each cell is calculated, either in terms of cell index or absolute or relative distance to a  
233 reference, in a two-step procedure (Fig. 3F,G). In the first step, a Bezier ring (a  
234 mathematically defined curved line) will serve as reference for the proximal-distal  
235 distance field and is placed at one end of the tissue. In the case of the cone-shaped ovule  
236 primordium a small, near point-size Bezier ring is positioned at the distal tip of the  
237 primordium. Positioning the Bezier ring at the distal tip correlates with a biologically  
238 relevant maximum of the phytohormone auxin at the tip as inferred from the expression  
239 of the auxin response reporter pDR5::GFP [39], the spatial signal of the auxin sensor  
240 R2D2 [40,41], and the finding that polar auxin transport mediated by *PINFORMED1*  
241 (*PINI*) is required for ovule primordium formation [42,43]. In case of the mature  
242 funiculus that is close in shape to a curved cylinder, a larger Bezier ring is placed at its  
243 proximal end. Origin cells are then defined by their close distance in 3D (usually 5-15  
244  $\mu\text{m}$ ) to the user-specified Bezier ring (Fig. 1C,D). They act as seeds for the distance  
245 coordinates of the remaining cells of the tissue that are obtained by searching for the  
246 shortest path through the cell centroids to the centroid of an origin cell. The search is  
247 restricted to a radial layer and by the anterior-posterior boundary. It should be noted that  
248 with this approach small axial distance errors still occur within the anterior or posterior  
249 domains depending on the number of laterally arranged cell files within these areas. The  
250 remaining errors are typically in the range of a few microns, but can be eliminated when  
251 taking individual cell files into account. This is possible within the software, however, the  
252 procedure involves cumbersome manual annotation of all cell files for each cell layer.  
253 Moreover, the gain of resolution is minimal.

254

## 255 **A coordinate system for integuments**

256 The two integuments undergo complex morphogenesis with the inner integument  
257 eventually resembling a curved cylindrical shell and the outer integument developing into  
258 a curved hood-like shell (Fig. 2A,B,F). Both integuments are characterized by their own  
259 intrinsic developmental axes (Fig. 2E-H). A distinct adaxial-abaxial (dorso-ventral) axis  
260 is prominent as the individual cell layers differ in cellular morphology and gene  
261 expression patterns [32,37,44–46] (Fig. 2E). Both integuments also feature their own  
262 proximal-distal axes (Fig. 2A,F). Related to its hood-like shape the outer integument  
263 flanks a frontal section and features a medial-lateral axis (Fig. 2G). As a rule, we position  
264 the ovule with the anterior domain and the micropyle pointing to the left and the proximal  
265 end of the funiculus pointing towards the bottom right. Based on this arrangement we  
266 define the left and right lateral sides of the medial-lateral axis (Fig. 2H).

267

268 We successfully applied to the integuments some of the same formal strategies as  
269 described for the primordium or funiculus. In an initial step, the integumentary adaxial-  
270 abaxial cell layers are labelled manually. In a subsequent step, medial-lateral coordinates  
271 of all cells of a given integument layer are established relative to a file of posterior  
272 midline cells (Fig. 4A). Cell distance is computed in terms of how many cells separate a  
273 given cell from the midline (Fig. 4B). Cells along the medial-lateral axis can be grouped  
274 further into median and lateral subdomains that occupy about half the width of an  
275 integument layer. For example, for the outer layer of the outer integument we grouped  
276 cells that are located three cells to the left or right of the posterior midline cells into the  
277 median domain. The remaining cells are classified as lateral cells (Fig. 4C). In the  
278 following step, proximal-distal distance coordinates are assigned for all integument cells.  
279 A Bezier ring is first placed at the proximal end of the inner side of the outer integument  
280 (next to its inner layer) facing the outer layer of the inner integument (Fig. 4D). The

281 circular origin is in the same plane as the ring-shaped expression pattern of the  
282 pCUC3::CUC3:CFP reporter which marks the proximal base of the two innermost layers  
283 of the inner integument, respectively (Fig. 4E). Members of the CUC gene family are  
284 generally required for primordium initiation and organ boundary formation [43,47–52].  
285 Origin cells are then defined by their close user-specified distance to the Bezier ring in  
286 3D (about 5-15  $\mu\text{m}$ ). As a direct result of the placement of the Bezier ring cells of the  
287 outer layer of the outer integument that are in direct contact with the subepidermal  
288 proximal chalaza are assigned a negative value for the proximal-distal position (Fig. 4F).  
289 This feature can be used to separately cluster and analyze those cells. Finally, proximal-  
290 distal distance coordinates of the integument cells are obtained by searching for the  
291 shortest path through the cell centroids to the centroid of an origin cell (Fig. 4F,G). The  
292 search is again restricted to a given tissue layer and may not cross the medial-lateral  
293 boundary. Taken together, the procedure assigns medial-lateral and proximal-distal  
294 positions for all cells of the integuments.

295

## 296 **Differential distribution of cellular growth patterns during** 297 **early ovule development**

298 To provide proof of concept for the usefulness of our computational tools in the  
299 quantitative analysis of cellular patterns in a 3D context we assessed spatial growth  
300 patterns in selected aspects of ovule development. To this end we made use of a  
301 previously published dataset of wild-type 3D digital ovules of the Col-0 accession [27].  
302 We first focused on primordium outgrowth. It was previously shown that ovule primordia  
303 grow in a continuous fashion based on an analysis of the total number of cells and the  
304 increase of organ volume from stages 1-I to 2-I [24,27]. However, it remained unclear  
305 how cell numbers and cell volumes of the radial layers compare to each other. In addition,

306 it was not known if mitoses are randomly distributed along the proximal-distal axis or if  
307 they preferentially occur in specific domains. To address these questions we analyzed 52  
308 3D digital wild-type ovule primordia that encompassed stages 1-I to 2-I (Fig. 5A,B).

309

310 We initially undertook a comparison of cell volumes between stages (Fig.5C) and radial  
311 layers (Fig. 5D) (Table 1). In this dataset the L2-derived MMCs at stage2-I feature an  
312 average cell volume of  $543.3 \mu\text{m}^3 \pm 120.6 \mu\text{m}^3$  (mean  $\pm$  SD) with a minimal volume of  
313  $335 \mu\text{m}^3$  [27]. Thus, the volume of the MMCs is beyond the largest cell volumes  
314 observed for other cells (Fig. 5C). We therefore eliminated the MMCs from this analysis  
315 to eliminate skewing of the results due to their out-of-range size. We observed that the  
316 average volume of L1 cells slightly increased during development while the average  
317 volume of L2/L3 cells stayed about constant (Fig. 5D) (Table 1). The results further  
318 indicated that with the exception of the MMCs the L2 and L3 feature cells of about  
319 similar cell volumes while the L1 is composed of smaller cells.

320

321 We then compared cell numbers between stages (Fig. 5E) and radial layers (Fig. 5F)  
322 (Table 1). Overall, we observed a steady increase in cell numbers during primordium  
323 outgrowth (Fig. 5E). The L1 covers a larger surface of the primordium than the L2 or L3.  
324 Considering this aspect and given the smaller cell volume of L1 cells in comparison to  
325 L2/L3 cells, we hypothesized that the L1 consists of more cells than the L2 and L3. This  
326 assumption was supported by layer-specific cell counts (Fig. 5F) (Table 1). We also  
327 determined that the L1 showed the largest percentage increase in cell numbers while the  
328 L3 showed the least percentage increase in cell numbers (Fig. 5G).

329

330 Next, we assessed the spatial distribution of mitoses. To this end we manually labelled  
331 cells that exhibit mitotic figures (Fig. 5A,B). We identified a total of 52 mitotic cells in  
332 our dataset comprising 52 3D digital ovule primordia. We first asked if there were  
333 differences in the number of mitoses between the cell layers. We found 33 mitotic cells in  
334 the L1, 18 in the L2, and 1 in the L3. This result is in line with the observed differences in  
335 cell numbers between the three layers (Fig. 5F). We then investigated if there was a  
336 difference between the number of mitotic cells in the anterior and posterior L1. We found  
337 23 and 10 mitoses in the anterior and posterior L1, respectively, indicating that more cell  
338 divisions occur in the anterior domain. Finally, we analysed the proximal-distal  
339 distribution of mitoses. We found that about 80 to 85 percent of scored mitotic cells were  
340 located in the proximal half of the developing primordium (Fig. 5H).

341

342 Taken together, our data indicate that primordium outgrowth is preferentially driven by  
343 an increase in cell number, not cell volume. In addition, they suggest unequal spatial  
344 distribution of mitoses between cell layers and along the anterior-posterior and proximal-  
345 distal axes. A higher number of mitoses in the anterior domain might explain primordium  
346 slanting. The data further indicate that a cell proliferation zone located in the bottom half  
347 of the developing primordium contributes significantly to its outgrowth.

348

### 349 **Funiculus curvature correlates with differences in cell number** 350 **and cell volume along the anterior-posterior and proximal-** 351 **distal axes**

352 To obtain insight into the cellular processes underlying funiculus curvature we performed  
353 an initial analysis of its cellular characteristics using 14 3D digital ovules of stage 3-IV

354 (Fig. 6A-E). By this stage growth of the funiculus has ceased [27]. We focused on the L1  
355 and L2 layers. To investigate cellular features of the L2 we digitally removed the L1 from  
356 the 3D digital funiculi. First, we assessed the proximal-distal distance and cell number  
357 along the L1 midlines of the anterior and posterior domains, respectively (Fig. 6A-E). We  
358 observed that the anterior midline was longer and characterized by a higher number of  
359 cells in comparison to the posterior midline. To directly compare volumes of anterior and  
360 posterior cells we converted the cells' coordinates into relative proximal-distal positions  
361 [53]. There we noticed a gradient in the volume of anterior L1 and L2 cells with the  
362 distal-most cells featuring nearly 1.5 to 2 times the volume of cells located at the  
363 proximal end (Fig. 6D,E). We did not detect a noticeable volume increase in the posterior  
364 cells.

365

366 In summary, our data suggest that a combination of differential cell proliferation along  
367 the anterior-posterior axis and unequal cell growth along the proximal-distal axis of the  
368 anterior domain contributes to the curvature of the funiculus.

369

## 370 **Proximal-distal growth gradient in *Arabidopsis* integuments**

371 Genetic data indicated that asymmetric growth of the outer integument contributes  
372 significantly to the anatropous shape of the ovule [27,54,55]. However, the 3D  
373 architecture of integument cells in relation to their position within the tissue remained  
374 unknown. Thus, we undertook a first analysis of the 3D geometry of integument cells in  
375 3D digital ovules of stage 3-IV. At this stage curvature is underway but not yet  
376 completed. We used 3DCoordX to measure cell volumes of the outer layer of the outer  
377 integument along the proximal-distal axis. We found a gradient in cell volume along this  
378 axis. We observed that proximal cells exhibited small cell volumes while, with the

379 exception of small cells at the tip of the integument, distal cells were characterized by  
380 larger sizes (Fig. 7A). Next, we expanded the 3D cellular analysis to all cells of the  
381 integuments. In a typical stage 3-IV 3D digital ovule we found a proximal-distal gradient  
382 of cell volumes in cells of the other layers, but at a smaller scale compared to the outer  
383 layer of the outer integument (Fig. 7A-C). We then compared cell length to cell position  
384 along the proximal-distal axis in the medial domain of the inner layer of the outer  
385 integument across five different specimens. We found that cell length increased along the  
386 proximal-distal axis (Fig. 7D).

387

388 Taken together, our data suggest that preferential cell elongation along the proximal-distal  
389 axis may be an important factor underlying differential growth of the outer integument  
390 and ovule curvature.

391

## 392 **Application to other plant organs**

393 Finally, we explored if our approach for an organ-intrinsic coordinate system was useful  
394 beyond the Arabidopsis ovule and could be of value to provide spatial context to cellular  
395 growth patterns in different organs of various plant species. To this end we investigated  
396 3D digital plant organs of diverse morphological complexity. We first inspected the  
397 archegonium of the liverwort genetic model system *Marchantia polymorpha*. The  
398 archegonium is an organ of simple morphology consisting of two main tissues: the  
399 spherical venter harboring the egg cell and the elongated neck through which the sperm  
400 cell reaches the egg cell [56]. We generated two 3D digital archegonia: a younger  
401 specimen A and an older specimen B. Both archegonia were imaged, 3D segmented, and  
402 cells of the neck, neck canal, venter, and venter canal were identified and labelled  
403 manually. We removed the egg and canal cells from our analysis and focused on the



404 venters and the necks of the two 3D digital archegonia (Fig. 8A,B). A first inspection  
405 already revealed differences between the two specimens. We observed that the venter of  
406 specimen A possessed only one cell layer with no obvious signs of periclinal cell  
407 division. By contrast, we found that a scattered pattern of periclinal cell divisions had  
408 occurred in the venter of specimen B associated with the formation of a second cell layer  
409 (Fig. 8B) [56]. This observation indicated temporal and spatial asynchrony in the control  
410 of these periclinal cell divisions.

411

412 A monolayer of cells formed the necks of both specimens. We implemented an organ  
413 coordinate system to enable a spatial analysis of some basic cellular parameters along the  
414 long axes of the two specimens. We placed a Bezier ring at the boundary between the  
415 venter and neck cells (Fig. 8A,B). The placement of the ring resulted in the assignment of  
416 positive and negative organ coordinate values for the venter and neck cells, respectively.  
417 We then assessed the basis of the differences in neck lengths between the two specimens.  
418 Measuring neck length along the main central axis revealed that the neck of specimen B  
419 was about 2 times longer than specimen A (329  $\mu\text{m}$  versus 160  $\mu\text{m}$ ). We then asked if the  
420 length disparity between the necks of the two specimens was due to a difference in cell  
421 numbers and/or cell elongation. We determined 98 and 114 neck cells for specimens A  
422 and B, respectively, indicating a minor difference in neck cell numbers. Next, we  
423 quantified cell length along the central organ axis for all neck cells. We observed that the  
424 neck cells of specimen A had an average length of  $10.3 \mu\text{m} \pm 2.4 \mu\text{m}$  and exhibited a  
425 relatively uniform cell length (Fig. 8C). Neck cells of specimen B showed a more  
426 heterogeneous distribution of cell length and were noticeably more elongated with an  
427 average cell length of  $20.8 \pm 5.6 \mu\text{m}$ . Moreover, cell elongation increased towards the tip  
428 of the neck in specimen B while no such increase was observed for specimen A (Fig. 8D).

429 The results indicated that enhanced cell elongation along the central axis of the neck was  
430 mainly associated with the increase in neck length in specimen B in comparison to  
431 specimen A.

432

433 Finally, we turned our attention to a plant organ of complex 3D morphology. The cup-  
434 shaped trap of the aquatic carnivorous plant *Utricularia gibba* represents a highly curved  
435 3D leaf form [57,58]. Quantitative growth analysis at the tissue level combined with  
436 computer modeling indicated that the complex shape transformations occurring during  
437 trap development are associated with differential rates and orientations of growth [59,60].  
438 However, a quantitative analysis of 3D cellular parameters had not been performed. To  
439 obtain first insight into the cellular basis of the growth patterns shaping the *Utricularia*  
440 trap we generated a 3D digital representation with cellular resolution of an intermediate-  
441 stage trap collected 6 days after initiation [59]. By this stage an invagination in the near-  
442 spherical young trap had occurred, followed by the formation of further folds and tissue  
443 broadening, and resulting in the emergence of the interior trap door and threshold (Fig.  
444 9A-C). We manually labelled the various tissues, including the abaxial and adaxial cells  
445 of the wall, the threshold, and the combined trap door/palate domain, and distinguished  
446 between medial and lateral domains of the adaxial and abaxial wall, respectively. To  
447 define an origin of the distance coordinate system we placed an ellipsoid Bezier ring at  
448 the boundary between the base of the threshold and the wall of the trap (Fig. 9D). We  
449 then asked if there were position-related differences in cell volume in the epidermal  
450 layers of the wall and threshold by analyzing epidermal cells located along the respective  
451 midlines of the tissues (Fig. 9E-G). We observed that cell volume varied along the  
452 measured distances. For example, we noticed a sudden increase in cell volume in an  
453 interval from 240  $\mu\text{m}$  to 320  $\mu\text{m}$  for cells of the abaxial wall (Fig. 9F). This region

454 precedes a prominent kink in the abaxial wall (Fig. 9E). By contrast, cell volumes of the  
455 adaxial wall dropped towards the end. The decrease in cell volume was likely associated  
456 with the tapering of the adaxial wall that could be observed in this area. Volumes of  
457 threshold cells positioned within a range of 80 to about 150  $\mu\text{m}$  from the origin showed  
458 relatively small volumes in comparison to the cells flanking this interval (Fig. 9G). The  
459 80-150  $\mu\text{m}$  zone corresponded to a section of the threshold which was only moderately  
460 curved and provided a large surface exposed to the lumen of the trap (Fig. 9E). Taken  
461 together, the data revealed spatial differences in cell volume for all three examined tissues  
462 of this specimen and support the notion that differential cell growth contributes to the  
463 morphogenesis of the Utricularia trap.

464

465

## 466 **Discussion**

467 The generation of biological form can be explained in terms of growth oriented relative to  
468 an organ-centric coordinate system [7,28,61]. To understand tissue morphogenesis it is  
469 therefore essential to provide spatial context to the quantitative analysis of the molecular  
470 and cellular networks that underlie the development of tissues and organs. It requires  
471 robust methods that enable the objective assignment of position to individual cells in a  
472 rapid and reliable manner. Here, we developed 3DCoordX, a collection of computational  
473 tools that enable the assignment of organ-centric coordinate systems to several different  
474 plant organs with complex shapes that were not accessible with previous methods. By  
475 applying mathematically defined criteria for the annotation of cell position in 3D the tools  
476 largely eliminate user-derived ambiguities in the cell annotation process. 3DCoordX is  
477 implemented as an add-on to the open-source software MorphoGraphX [11,14] (preprint).  
478 A detailed user guide can be found in the supplement. 3DCoordX enables quantitative

479 analyses of cellular features in their spatial context, in a rapid manner, and on a large  
480 scale.

481

482 We took advantage of the recently made available 3D digital reference atlas of the  
483 *Arabidopsis* ovule to develop generic conceptual and computational approaches that  
484 enable the assignment of 3D coordinate systems to organs of simple as well as complex  
485 curved morphology. Previous efforts, such as iRoCS [9] and 3DCellAtlas [10], relied on  
486 externally imposed coordinate systems. The design of the strategies for the annotation of  
487 cell position presented here is guided by intrinsic patterning processes and assign cell  
488 distance in relation to organ-centric developmental axes. Such tissue polarity axes are  
489 thought to play a central role in the spatial control of growth [28,62,63]. To accommodate  
490 the particular architecture of the ovule we devised two 3D coordinate systems, one for the  
491 main “trunk”, the central proximal-distal axis consisting of the nucellus, chalaza and  
492 funiculus, and one for the integuments. Both coordinate systems are based on similar  
493 general principles. First, we distinguish between individual cell layers as in the L1 to L3  
494 layers of the primordium or the adaxial-abaxial (dorso-ventral) cell layers of the two  
495 integuments. Importantly, with the concept of “outside wall area ratio” 3DCoordX  
496 embodies a new strategy for the classification of the radial layers. It does not rely on a  
497 surface mesh for classification and thus is more versatile than other published methods.  
498 Second, the cell layers then become subdivided into two domains: the anterior-posterior  
499 domains of the trunk and the medial-lateral domains of the integument cell layers. Third,  
500 subsequent assignment of a proximal-distal distance value to each cell is constricted by  
501 these two prepatterns. For the placement of reference Bezier rings we took cues from the  
502 localization of important developmental regulators, such as the presence of an auxin  
503 maximum at the distal tip of the ovule primordium or the *CUC3* expression in the chalaza

504 [39–41,52]. As a result of the approach each cell is annotated in 3D with respect to the  
505 radial and proximal-distal dimensions as well as to either an anterior-posterior or medial-  
506 lateral axis. With the help of 3DCoordX we readily discovered previously unidentified  
507 cellular growth patterns in the primordium and integuments. For example, our data  
508 indicate a basal cell proliferation zone in the ovule primordium and suggest that  
509 preferential cell proliferation in the anterior domain is important for primordium slanting.  
510 Moreover, we obtained evidence that the increase in cell volume along the proximal-  
511 distal axis of the outer integument, a tissue without radial symmetry, is mainly explained  
512 by an increase in cell length.

513

514 Importantly, our work revealed that the respective principles can be successfully applied  
515 to the establishment of coordinate systems for organs of varying degrees of  
516 morphological complexity and the subsequent quantitative analysis of 3D cellular  
517 parameters. We provided evidence for a preferential increase in cell length during axial  
518 neck growth of the *Marchantia* archegonium. Moreover, we identified distinct cellular  
519 patterns possibly associated with important morphological features of the intricately  
520 folded *U. gibba* trap. These data reveal that 3DCoordX has broad applicability and  
521 eliminates the need to work with multiple different pipelines when analyzing the cellular  
522 architecture of organs in 3D. The general strategies and computational methods put  
523 forward in this work will greatly reduce the time required for the spatial analysis of  
524 cellular parameters so central to various approaches, such as computational modeling of  
525 morphogenesis or comparative morphometry of specimens from different genotypes.

526

527

## 528 **Materials and Methods**

## 529 **Plant work and lines**

530 *Arabidopsis thaliana* (L.) Heynh. var. Columbia (Col-0) was used as a wild-type strain.  
531 Plants were grown on soil as described earlier [64]. The pKAN1::KAN1:2xGFP construct  
532 [38] and the pCUC3::CFP line [52] were gifts from Marcus Heisler and Nicolas Arnaud,  
533 respectively. Wild-type plants were transformed with the pKAN1::KAN1:2xGFP  
534 construct using *Agrobacterium* strain GV3101/pMP90 [65] and the floral dip method  
535 [66]. Transgenic T1 plants were selected on Glufosinate (Basta) (10 µg/ml) plates and  
536 transferred to soil for further inspection. *Marchantia polymorpha* of the BoGa ecotype  
537 was grown on half-strength Gamborg's B5 medium under long day conditions (16L:8D)  
538 at 22°C. For induction of reproductive structures, plants were grown under 60 µmol white  
539 light supplemented with far red light (730 nm) on half-strength Gamborg's B5 medium  
540 supplemented with 1 % glucose and 14 g/L agarose [67]. Gametangiophores appeared  
541 after 4–6 weeks.

542

## 543 **Clearing and staining of tissue samples**

544 Treatment of ovules of the pKAN1::KAN1:2xGFP and the pCUC3::CFP lines was done  
545 as described in [68] and [27]. Tissue was fixed in 4% paraformaldehyde in PBS followed  
546 by two washes in PBS before transfer into the ClearSee solution (xylitol (10%, w/v),  
547 sodium deoxycholate (15%, w/v), urea (25%, w/v), in H<sub>2</sub>O) [69]. Clearing was done at  
548 least overnight or for up to two to three days. Cell wall staining with SR2200  
549 (Renaissance Chemicals, Selby, UK) was performed as described in [70]. Cleared tissue  
550 was washed in PBS and then put into a PBS solution containing 0.1% SR2200 and a  
551 1/1000 dilution of the nuclear stain TO-PRO-3 iodide (Thermo Fisher Scientific) for 20  
552 minutes. Tissue was washed in PBS for one minute, transferred again to ClearSee for 20  
553 minutes before mounting in Vectashield antifade agent (Vector Laboratories, Burlingame,

554 CA, USA). *Marchantia* archegoniophores were fixed for 1 week in 4% paraformaldehyde  
555 in PBS followed by two washes in PBS before transfer to ClearSee. Clearing was done  
556 for 4-7 days. Cell wall staining and subsequent clearing, washing and mounting steps  
557 were the same as for *Arabidopsis* ovules. Archegonia were dissected in Vectashield  
558 mounting medium (Vector Laboratories, Burlingame, CA, USA).

559

## 560 **Microscopy and image acquisition**

561 Confocal laser scanning microscopy of ovules stained with SR2200 and TO-PRO-3  
562 iodide was performed on an upright Leica TCS SP8 X WLL2 HyVolution 2 (Leica  
563 Microsystems) equipped with GaAsP (HyD) detectors and a 63x glycerol objective (HC  
564 PL anterior-posteriorO CS2 63x/1.30 GLYC, CORR CS2). Scan speed was at 400 Hz, the  
565 pinhole was set to 0.6 Airy units, line average between 2 and 4, and the digital zoom  
566 between 1 and 2. For z-stacks, 12-bit images were captured at a slice interval of 0.24  $\mu\text{m}$   
567 with voxel size of 0.125  $\mu\text{m}$  x 0.125  $\mu\text{m}$  x 0.24  $\mu\text{m}$ . Laser power or gain was adjusted for  
568 z compensation to obtain an optimal z-stack. Images were adjusted for color and contrast  
569 using Adobe Photoshop 2021 (Adobe, San Jose, USA) or MorphographX [14] software.  
570 Image acquisition parameters for the pKAN1::KAN1:2xGFP line were the following:  
571 SR2200; 405 diode laser 0.10%, HyD 420–480 nm, detector gain 10. 2xGFP; 488 nm  
572 Argon laser 2%, HyD 525-550 nm, detector gain 100. TO-PRO-3; 642 nm White Laser  
573 2%, HyD 660–720 nm, detector gain 100. In each case sequential scanning was  
574 performed to avoid crosstalk between the spectra. Image acquisition parameters for the  
575 pCUC3::CFP line were the following: SR2200; 405 diode laser 0.10%, HyD 420–480  
576 nm, detector gain 10. CFP; 514 nm Argon laser 2%, HyD 525-550 nm, detector gain 100.  
577 TO-PRO-3; 642 nm White Laser 2%, HyD 660–720 nm, detector gain 100. In each case  
578 sequential scanning was performed to avoid crosstalk between the spectra. Imaging

579 conditions for the *Marchantia* archegonia stained with SR2200 and TO-PRO-3 iodide  
580 were the same as for the ovules. The late stage *Marchantia* archegonium was imaged  
581 using the same 63x glycerol objective and a tilescan of 8 tiles. For z-stacks of the older  
582 specimen, 8-bit images were captured at a slice interval of 0.33  $\mu\text{m}$  with voxel size of  
583 0.126  $\mu\text{m}$  x 0.126  $\mu\text{m}$  x 0.33  $\mu\text{m}$ ; for z-stack of the younger 12-bit images were captured  
584 at a slice interval of 0.33  $\mu\text{m}$  with voxel size of 0.127  $\mu\text{m}$  x 0.127  $\mu\text{m}$  x 0.33  $\mu\text{m}$ . Tiles  
585 were stitched and merged to form the final 3D image stack of the organ in Leica  
586 Application Suite X data processing software (LASX v3.5.7.23225). The early stage  
587 archegonium was imaged without tile scan.

588

589

## 590 **Datasets and 3D cell segmentation**

591 The dataset encompassing the segmented wild-type 3D digital ovules was described  
592 earlier [27]. The two z-stacks of *Marchantia* archegonia were 3D cell segmented using the  
593 PlantSeg pipeline [17]. The z-stack of the *Utricularia gibba* trap was obtained from a  
594 fixed and modified pseudo-Schiff-stained [71] specimen [59]. 3D cell segmentation was  
595 performed using the PlantSeg-MorphoGraphX hybrid method as described in [27]. In all  
596 instances generation of cell surface meshes and cell type labeling was performed with  
597 MorphoGraphX.

598

## 599 **Software**

600 The MorphoGraphX software was used for the generation of cell surface meshes, cell type  
601 labeling, and the analysis of 3D cellular features [14]. It can be downloaded from its  
602 website (<https://www.mpiz.mpg.de/MorphoGraphX>). The 3DCoordX toolbox is  
603 integrated as an add-on in MorphoGraphX 2.0. A detailed user manual is provided in the



604 supplement. The PlantSeg pipeline [17] was used for 3D cell boundary prediction and  
605 segmentation. The software can be obtained from its Github repository  
606 (<https://github.com/hci-unihd/plant-seg>).

607

## 608 **Acknowledgements**

609 We thank Marcus Heisler and Nicolas Arnaud for the pKAN1::KAN1:2xGFP and  
610 pCUC3::CFP lines, respectively. We also thank Peter Schroeder and Claus  
611 Schwechheimer for providing *Marchantia polymorpha* female gametophyte samples. We  
612 thank members of the Schneitz lab for helpful discussions and Adam Runions for  
613 discussions on growth alignment graphs. We further thank Enrico Coen for insightful  
614 comments. We acknowledge support by the Center for Advanced Light Microscopy  
615 (CALM) of the TUM School of Life Sciences. This work was funded by the German  
616 Research Council (DFG) through grants FOR2581 (TP7) to KS, (TP8) to RS, (TP9) to  
617 MT and a Max Planck Society core grant to MT. Work by KL was funded by the  
618 Biotechnology and Biological Sciences Council (BBSRC) through grants  
619 BBS/E/J/00000152, BBS/E/J/000PR9787, and BBS/E/J/000CA517.

620

## 621 **Competing interests**

622 There are no financial or non-financial competing interests.

623

## 624 **Authors' contributions**

625 AV, SS, RS and KS designed the study. AV, SS, RT, TAM, and KL performed the  
626 experiments. AV, SS, RT, TAM, KL, MT, RS and KS interpreted the results. MT, RS and

627 KS secured funding. KS wrote the paper with comments from all authors. All authors  
628 read and approved the final manuscript.

629

## 630 **References**

- 631 1. Boutros M, Heigwer F, Laufer C. Microscopy-based high-content  
632 screening. *Cell*. 2015;163: 1314–1325.
- 633 2. Hong L, Dumond M, Zhu M, Tsugawa S, Li C-B, Boudaoud A, et al.  
634 Heterogeneity and robustness in plant morphogenesis: from cells to organs. *Annu*  
635 *Rev Plant Biol*. 2018;69: 469–495.
- 636 3. Jackson MDB, Duran-Nebreda S, Kierzkowski D, Strauss S, Xu H,  
637 Landrein B, et al. Global Topological Order Emerges through Local Mechanical  
638 Control of Cell Divisions in the Arabidopsis Shoot Apical Meristem. *Cell Syst*.  
639 2019;8: 53–65.e3.
- 640 4. Kierzkowski D, Runions A, Vuolo F, Strauss S, Lymbouridou R, Routier-  
641 Kierzkowska A-L, et al. A Growth-Based Framework for Leaf Shape Development  
642 and Diversity. *Cell*. 2019;177: 1405–1418.e17.
- 643 5. Kierzkowski D, Routier-Kierzkowska A-L. Cellular basis of growth in  
644 plants: geometry matters. *Curr Opin Plant Biol*. 2019;47: 56–63.
- 645 6. Sapala A, Runions A, Smith RS. Mechanics, geometry and genetics of  
646 epidermal cell shape regulation: different pieces of the same puzzle. *Curr Opin Plant*  
647 *Biol*. 2019;47: 1–8.
- 648 7. Thompson DW. *On Growth and Form*. 2nd ed. Cambridge, UK:  
649 Cambridge University Press; 1942.
- 650 8. Hejnowicz Z. Trajectories of principal directions of growth, natural  
651 coordinate system in growing plant organ. *Acta Soc Bot Pol*. 1984;53: 29–42.
- 652 9. Schmidt T, Pasternak T, Liu K, Blein T, Aubry-Hivet D, Dovzhenko A, et  
653 al. The iRoCS Toolbox--3D analysis of the plant root apical meristem at cellular  
654 resolution. *Plant J*. 2014;77: 806–814.
- 655 10. Montenegro-Johnson TD, Stamm P, Strauss S, Topham AT, Tsagris M,  
656 Wood ATA, et al. Digital Single-Cell Analysis of Plant Organ Development Using  
657 3DCellAtlas. *Plant Cell*. 2015;27: 1018–1033.
- 658 11. Strauss S, Runions A, Lane B, Eschweiler D, Bajpai N, Trozzi N, et al.  
659 MorphoGraphX 2.0: Providing context for biological image analysis with positional  
660 information. *bioRxiv*. bioRxiv; 2021. doi:10.1101/2021.08.12.456042

- 661 12. Fernandez R, Das P, Mirabet V, Moscardi E, Traas J, Verdeil J-L, et al.  
662 Imaging plant growth in 4D: robust tissue reconstruction and lineaging at cell  
663 resolution. *Nat Methods*. 2010;7: 547–553.
- 664 13. Lowekamp BC, Chen DT, Ibáñez L, Blezek D. The design of SimpleITK.  
665 *Front Neuroinform*. 2013;7: 45.
- 666 14. Barbier de Reuille P, Routier-Kierzkowska A-L, Kierzkowski D, Bassel  
667 GW, Schüpbach T, Tauriello G, et al. MorphoGraphX: A platform for quantifying  
668 morphogenesis in 4D. *Elife*. 2015;4: 05864.
- 669 15. Stegmaier J, Amat F, Lemon WC, McDole K, Wan Y, Teodoro G, et al.  
670 Real-time three-dimensional cell segmentation in large-scale microscopy data of  
671 developing embryos. *Dev Cell*. 2016;36: 225–240.
- 672 16. Eschweiler D, Spina TV, Choudhury RC, Meyerowitz E, Cunha A,  
673 Stegmaier J. CNN-based preprocessing to optimize watershed-based cell  
674 segmentation in 3D confocal microscopy images. *IEEE*; 2019. pp. 223–227.
- 675 17. Wolny A, Cerrone L, Vijayan A, Tofanelli R, Barro AV, Louveaux M, et  
676 al. Accurate and versatile 3D segmentation of plant tissues at cellular resolution.  
677 *Elife*. 2020;9. doi:10.7554/eLife.57613
- 678 18. Bassel GW, Stamm P, Mosca G, Barbier de Reuille P, Gibbs DJ, Winter  
679 R, et al. Mechanical constraints imposed by 3D cellular geometry and arrangement  
680 modulate growth patterns in the *Arabidopsis* embryo. *Proc Natl Acad Sci U S A*.  
681 2014;111: 8685–8690.
- 682 19. Yoshida S, Barbier de Reuille P, Lane B, Bassel GW, Prusinkiewicz P,  
683 Smith RS, et al. Genetic control of plant development by overriding a geometric  
684 division rule. *Dev Cell*. 2014;29: 75–87.
- 685 20. Lora J, Herrero M, Tucker MR, Hormaza JI. The transition from somatic  
686 to germline identity shows conserved and specialized features during angiosperm  
687 evolution. *New Phytol*. 2017;216: 495–509.
- 688 21. Pasternak T, Haser T, Falk T, Ronneberger O, Palme K, Otten L. A 3D  
689 digital atlas of the *Nicotiana tabacum* root tip and its use to investigate changes in  
690 the root apical meristem induced by the *Agrobacterium* 6b oncogene. *Plant J*.  
691 2017;92: 31–42.
- 692 22. Montenegro-Johnson T, Strauss S, Jackson MDB, Walker L, Smith RS,  
693 Bassel GW. 3DCellAtlas Meristem: a tool for the global cellular annotation of shoot  
694 apical meristems. *Plant Methods*. 2019;15: 33.
- 695 23. Graeff M, Rana S, Wendrich JR, Dorier J, Eekhout T, Fandino ACA, et al.  
696 A morpho-transcriptomic map of brassinosteroid action in the *Arabidopsis* root.  
697 *Molecular Plant*. 2021; 2021.03.30.437656.
- 698 24. Hernandez-Lagana E, Mosca G, Mendocilla-Sato E, Pires N, Frey A,  
699 Giraldo-Fonseca A, et al. Organ geometry channels reproductive cell fate in the  
700 *Arabidopsis* ovule primordium. *Elife*. 2021;10. doi:10.7554/eLife.66031

- 701 25. Refahi Y, Zardilis A, Michelin G, Wightman R, Leggio B, Legrand J, et al.  
702 A multiscale analysis of early flower development in Arabidopsis provides an  
703 integrated view of molecular regulation and growth control. *Dev Cell*. 2021;56: 540–  
704 556.e8.
- 705 26. Silveira SR, Le Gloanec C, Gómez-Felipe A, Routier-Kierzkowska A-L,  
706 Kierzkowski D. Live-imaging provides an atlas of cellular growth dynamics in the  
707 stamen. *Plant Physiol*. 2021 [cited 5 Aug 2021]. doi:10.1093/plphys/kiab363
- 708 27. Vijayan A, Tofanelli R, Strauss S, Cerrone L, Wolny A, Strohmeier J, et  
709 al. A digital 3D reference atlas reveals cellular growth patterns shaping the  
710 Arabidopsis ovule. *Elife*. 2021;10. doi:10.7554/eLife.63262
- 711 28. Whitewoods CD, Coen E. Growth and development of three-dimensional  
712 plant form. *Curr Biol*. 2017;27: R910–R918.
- 713 29. Bouman F. The ovule. Johri BM, editor. *Embryology of Angiosperms*.  
714 New York: Springer Verlag; 1984. pp. 123–157.
- 715 30. Endress PK. Angiosperm ovules: diversity, development, evolution. *Ann*  
716 *Bot*. 2011;107: 1465–1489.
- 717 31. Robinson-Beers K, Pruitt RE, Gasser CS. Ovule development in wild-type  
718 Arabidopsis and two female-sterile mutants. *Plant Cell*. 1992;4: 1237–1249.
- 719 32. Schneitz K, Hülskamp M, Pruitt RE. Wild-type ovule development in  
720 Arabidopsis thaliana: a light microscope study of cleared whole-mount tissue. *Plant*  
721 *J*. 1995;7: 731–749.
- 722 33. Jenik PD, Irish VF. Regulation of cell proliferation patterns by homeotic  
723 genes during Arabidopsis floral development. *Development*. 2000;127: 1267–1276.
- 724 34. Satina S, Blakeslee AF, Avery AG. Demonstration of the three germ layers  
725 in the shoot apex of Datura by means of induced polyploidy in periclinal chimeras.  
726 *Am J Bot*. 1940;27: 895–905.
- 727 35. Reiser L, Modrusan Z, Margossian L, Samach A, Ohad N, Haughn GW, et  
728 al. The BELL1 gene encodes a homeodomain protein involved in pattern formation  
729 in the Arabidopsis ovule primordium. *Cell*. 1995;83: 735–742.
- 730 36. Gross-Hardt R, Lenhard M, Laux T. WUSCHEL signaling functions in  
731 interregional communication during Arabidopsis ovule development. *Genes Dev*.  
732 2002;16: 1129–1138.
- 733 37. Sieber P, Gheyselinck J, Gross-Hardt R, Laux T, Grossniklaus U, Schneitz  
734 K. Pattern formation during early ovule development in Arabidopsis thaliana. *Dev*  
735 *Biol*. 2004;273: 321–334.
- 736 38. Caggiano MP, Yu X, Bhatia N, Larsson A, Ram H, Ohno CK, et al. Cell  
737 type boundaries organize plant development. *Elife*. 2017;6. doi:10.7554/eLife.27421
- 738 39. Benková E, Michniewicz M, Sauer M, Teichmann T, Seifertová D,

- 739 Jürgens G, et al. Local, efflux-dependent auxin gradients as a common module for  
740 plant organ formation. *Cell*. 2003;115: 591–602.
- 741 40. Liao C-Y, Smet W, Brunoud G, Yoshida S, Vernoux T, Weijers D.  
742 Reporters for sensitive and quantitative measurement of auxin response. *Nat*  
743 *Methods*. 2015;12: 207–10, 2 p following 210.
- 744 41. Kawamoto N, Del Carpio DP, Hofmann A, Mizuta Y, Kurihara D,  
745 Higashiyama T, et al. A peptide pair coordinates regular ovule initiation patterns  
746 with seed number and fruit size. *Curr Biol*. 2020;30: 4352–4361.e4.
- 747 42. Bencivenga S, Simonini S, Benková E, Colombo L. The transcription  
748 factors BEL1 and SPL are required for cytokinin and auxin signaling during ovule  
749 development in *Arabidopsis*. *Plant Cell*. 2012;24: 2886–2897.
- 750 43. Galbiati F, Sinha Roy D, Simonini S, Cucinotta M, Ceccato L, Cuesta C,  
751 et al. An integrative model of the control of ovule primordia formation. *Plant J*.  
752 2013;76: 446–455.
- 753 44. Villanueva JM, Broadhvest J, Hauser BA, Meister RJ, Schneitz K, Gasser  
754 CS. INNER NO OUTER regulates abaxial- adaxial patterning in *Arabidopsis* ovules.  
755 *Genes Dev*. 1999;13: 3160–3169.
- 756 45. McAbee JM, Hill TA, Skinner DJ, Izhaki A, Hauser BA, Meister RJ, et al.  
757 ABERRANT TESTA SHAPE encodes a KANADI family member, linking polarity  
758 determination to separation and growth of *Arabidopsis* ovule integuments. *Plant J*.  
759 2006;46: 522–531.
- 760 46. Kelley DR, Skinner DJ, Gasser CS. Roles of polarity determinants in ovule  
761 development. *Plant J*. 2009;57: 1054–1064.
- 762 47. Aida M, Ishida T, Fukaki H, Fujisawa H, Tasaka M. Genes involved in  
763 organ separation in *Arabidopsis*: an analysis of the *cup-shaped cotyledon* mutant.  
764 *Plant Cell*. 1997;9: 841–857.
- 765 48. Ishida T, Aida M, Takada S, Tasaka M. Involvement of CUP-SHAPED  
766 COTYLEDON genes in gynoecium and ovule development in *Arabidopsis thaliana*.  
767 *Plant Cell Physiol*. 2000;41: 60–67.
- 768 49. Takada S, Hibara K, Ishida T, Tasaka M. The CUP-SHAPED  
769 COTYLEDON1 gene of *Arabidopsis* regulates shoot apical meristem formation.  
770 *Development*. 2001;128: 1127–1135.
- 771 50. Breuil-Broyer S, Morel P, de Almeida-Engler J, Coustham V, Negrutiu I,  
772 Trehin C. High-resolution boundary analysis during *Arabidopsis thaliana* flower  
773 development. *Plant Journal*. 2004;38: 182–192.
- 774 51. Sieber P, Wellmer F, Gheyselinck J, Riechmann JL, Meyerowitz EM.  
775 Redundancy and specialization among plant microRNAs: role of the MIR164 family  
776 in developmental robustness. *Development*. 2007;134: 1051–1060.
- 777 52. Gonçalves B, Hasson A, Belcram K, Cortizo M, Morin H, Nikovics K, et

- 778 al. A conserved role for CUP-SHAPED COTYLEDON genes during ovule  
779 development. *Plant J.* 2015;83: 732–742.
- 780 53. Zhang Z, Runions A, Mentink RA, Kierzkowski D, Karady M, Hashemi  
781 B, et al. A WOX/auxin biosynthesis module controls growth to shape leaf form. *Curr*  
782 *Biol.* 2020. doi:10.1016/j.cub.2020.09.037
- 783 54. Baker SC, Robinson-Beers K, Villanueva JM, Gaiser JC, Gasser CS.  
784 Interactions among genes regulating ovule development in. *Genetics.* 1997;145:  
785 1109–1124.
- 786 55. Schneitz K, Hülskamp M, Kopczak SD, Pruitt RE. Dissection of sexual  
787 organ ontogenesis: a genetic analysis of ovule development in *Arabidopsis thaliana*.  
788 *Development.* 1997;124: 1367–1376.
- 789 56. Shimamura M. *Marchantia polymorpha*: taxonomy, phylogeny and  
790 morphology of a model system. *Plant Cell Physiol.* 2016;57: 230–256.
- 791 57. Płachno BJ, Adamec L, Kamińska I. Relationship between trap anatomy  
792 and function in Australian carnivorous bladderworts (*Utricularia*) of the subgenus  
793 *Polypompholyx*. *Aquat Bot.* 2015;120: 290–296.
- 794 58. Reifenrath K, Theisen I, Schnitzler J, Porembski S, Barthlott W. Trap  
795 architecture in carnivorous *Utricularia* (Lentibulariaceae). *Flora - Morphology,*  
796 *Distribution, Functional Ecology of Plants.* 2006;201: 597–605.
- 797 59. Lee KJI, Bushell C, Koide Y, Fozard JA, Piao C, Yu M, et al. Shaping of a  
798 three-dimensional carnivorous trap through modulation of a planar growth  
799 mechanism. *PLoS Biol.* 2019;17: e3000427.
- 800 60. Whitewoods CD, Gonçalves B, Cheng J, Cui M, Kennaway R, Lee K, et  
801 al. Evolution of carnivorous traps from planar leaves through simple shifts in gene  
802 expression. *Science.* 2020;367: 91–96.
- 803 61. Coen E, Rebocho AB. Resolving conflicts: modeling genetic control of  
804 plant morphogenesis. *Dev Cell.* 2016;38: 579–583.
- 805 62. Kennaway R, Coen E, Green A, Bangham A. Generation of diverse  
806 biological forms through combinatorial interactions between tissue polarity and  
807 growth. *PLoS Comput Biol.* 2011;7: e1002071.
- 808 63. Kuhlemeier C, Timmermans MCP. The Sussex signal: insights into leaf  
809 dorsiventrality. *Development.* 2016;143: 3230–3237.
- 810 64. Fulton L, Batoux M, Vaddepalli P, Yadav RK, Busch W, Andersen SU, et  
811 al. DETORQUEO, QUIRKY, and ZERZAUST represent novel components  
812 involved in organ development mediated by the receptor-like kinase STRUBBELIG  
813 in *Arabidopsis thaliana*. *PLoS Genet.* 2009;5: e1000355.
- 814 65. Koncz C, Schell J. The promoter of TL-DNA gene 5 controls the tissue-  
815 specific expression of chimaeric genes carried by a novel *Agrobacterium* binary  
816 vector. *Mol Gen Genet.* 1986;204: 383–396.



- 817 66. Clough SJ, Bent AF. Floral dip: a simplified method for *Agrobacterium*-  
818 mediated transformation of *Arabidopsis thaliana*. *Plant J.* 1998;16: 735–743.
- 819 67. Althoff F, Kopischke S, Zobell O, Ide K, Ishizaki K, Kohchi T, et al.  
820 Comparison of the *MpEF1 $\alpha$*  and *CaMV35* promoters for application in *Marchantia*  
821 *polymorpha* overexpression studies. *Transgenic Res.* 2014;23: 235–244.
- 822 68. Tofanelli R, Vijayan A, Scholz S, Schneitz K. Protocol for rapid clearing  
823 and staining of fixed *Arabidopsis* ovules for improved imaging by confocal laser  
824 scanning microscopy. *Plant Methods.* 2019;15: 120.
- 825 69. Kurihara D, Mizuta Y, Sato Y, Higashiyama T. ClearSee: a rapid optical  
826 clearing reagent for whole-plant fluorescence imaging. *Development.* 2015;142:  
827 4168–4179.
- 828 70. Musielak TJ, Schenkel L, Kolb M, Henschen A, Bayer M. A simple and  
829 versatile cell wall staining protocol to study plant reproduction. *Plant Reprod.*  
830 2015;28: 161–169.
- 831 71. Truernit E, Bauby H, Dubreucq B, Grandjean O, Runions J, Barthél my J,  
832 et al. High-resolution whole-mount imaging of three-dimensional tissue organization  
833 and gene expression enables the study of Phloem development and structure in  
834 *Arabidopsis*. *Plant Cell.* 2008;20: 1494–1503.

835  
836

837

## 838 Figure legends

839

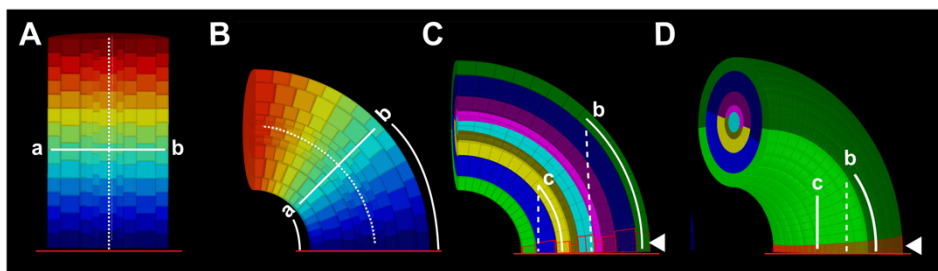

840

841 **Fig 1. Axial cell distance determination in curved tissue.** (A) Section through an  
842 artificial template of a tube-like and straight tissue consisting of multiple concentric cell  
843 layers. The heatmap indicates distance from the reference (red line at bottom). The  
844 dashed line outlines the central axis. Note that the two cells (a,b) at the same cell index

845 position also show the same absolute axial distance to the origin (B) Same structure as in  
846 (A) but curved. Note that cells a and b differ in their axial distances to the reference. (C)  
847 Same structure as in (B). The separate cell layers are distinguished by their different  
848 colors. Two cells in different layers are highlighted (c, b). Dashed lines indicate shortest  
849 distances to the reference ignoring tissue layers. Solid lines mark the shortest distances to  
850 the reference that are restricted to tissue layers. Confining the shortest distance to a given  
851 layer reduces axial distance errors. The red line at the bottom highlights the reference.  
852 The arrowhead marks origin cells outlined in red. Origin cells exhibit a close distance in  
853 3D to the reference (5-15  $\mu\text{m}$ ). (D) 3D representation of (C) revealing how the anterior-  
854 posterior boundary further minimizes the axial distance error for a cell in the posterior  
855 half of the structure.  
856



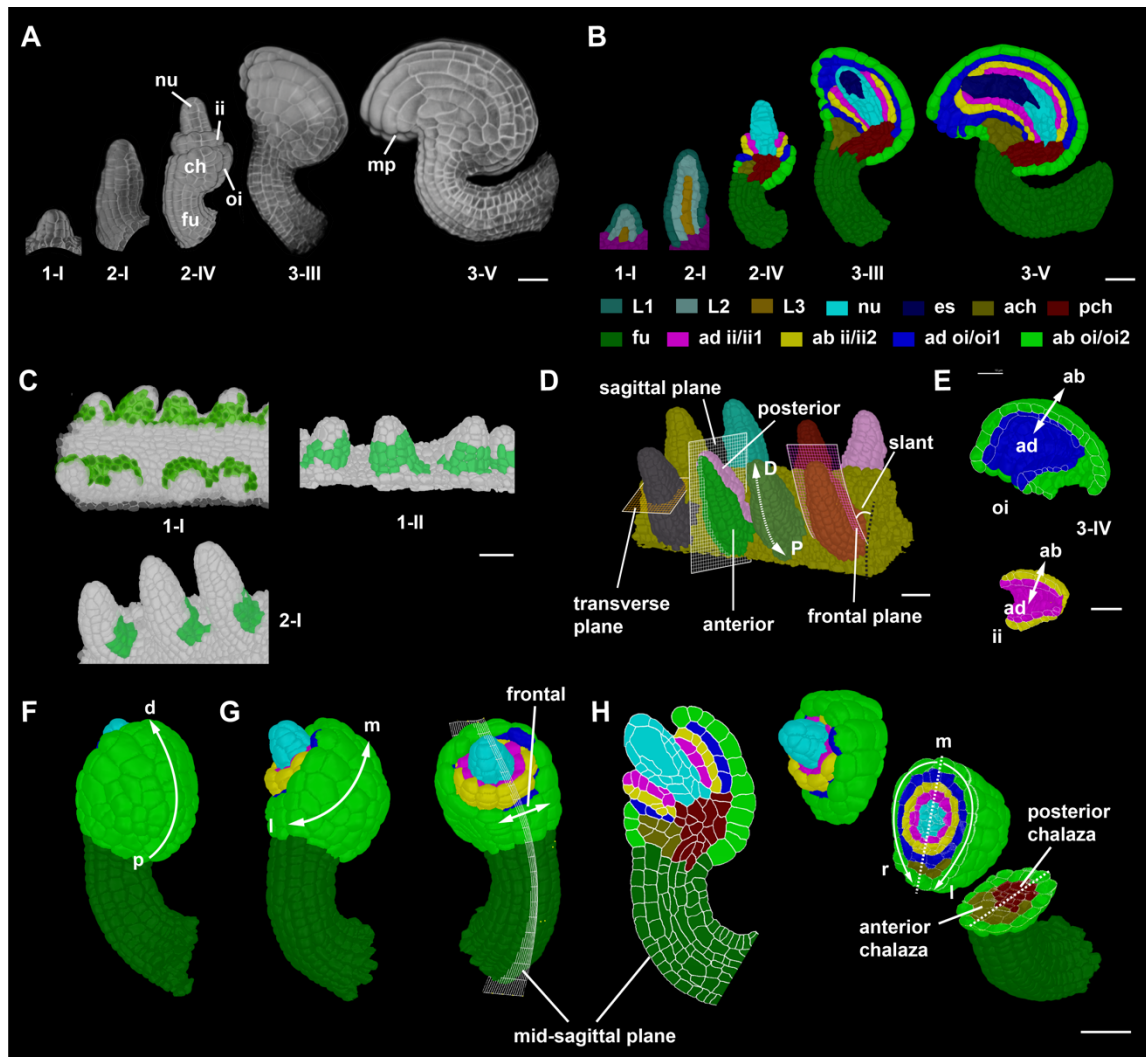

857

858 **Fig 2. Developmental axes in ovule development.** (A) 3D renderings of confocal z-  
 859 stacks of SR2200-stained cell walls of wild-type ovules of the indicated stages. (B) Mid-  
 860 sagittal sections through 3D digital ovules shown in (A). The different tissues are  
 861 indicated. (C) 3D cell meshes highlighting the expression of the pKAN1::KAN1:2xGFP  
 862 reporter in posterior epidermal cells from stage 1-I to 2-I in green. (D) 3D rendering of a  
 863 placenta area carrying eight wild-type stage 2-I ovules. The anterior-posterior and  
 864 proximal-distal axes are marked. The sagittal, transverse, and frontal planes are marked  
 865 by grids on the primordia. Frontal plane separates the anterior and posterior halves of the  
 866 organ. A Sagittal plane separates the left and right half of the organ. The dashed white  
 867 arrow indicates the proximal-distal axis. Black dotted line indicates the placental surface

868 to which the posterior side of the ovule is slanted with a small angle. (E) Outer and inner  
869 integument tissues extracted from the 3D mesh for visualizing the abaxial-adaxial  
870 polarity. Tilted view of mid-sagittal sections through the outer and inner integument,  
871 respectively, of a stage 3-IV 3D digital ovule. The arrows highlight the adaxial-abaxial  
872 axes of each integument. (F) Posterior view of a stage 2-V 3D digital ovule with the  
873 proximal-distal axis of the outer integument marked. (G) Side view (left) and anterior  
874 view (right) of the 3D digital ovule shown in (F). The medial-lateral axis of the outer  
875 integument and the frontal region are indicated. (H) A mid-sagittal section view (left) and  
876 a 3D clipped view (right) of the 3D digital ovule shown in (F) is depicted. It is oriented  
877 with the posterior side to the right. Tissue annotation as in (B). The 3D view allows the  
878 discrimination of the left-right sides of the 3D digital ovule. The dashed line indicates the  
879 medial line. Abbreviations: ab, abaxial; ad, adaxial; ach, anterior chalaza; ch, chalaza; ii,  
880 inner integument; es, embryo sac; fu, funiculus; mp, micropyle; nu, nucellus; oi, outer  
881 integument; pch, posterior chalaza; ml, medial-lateral; pd, proximal-distal; rl, right-left.  
882 Scale bars: 20  $\mu\text{m}$ .

883

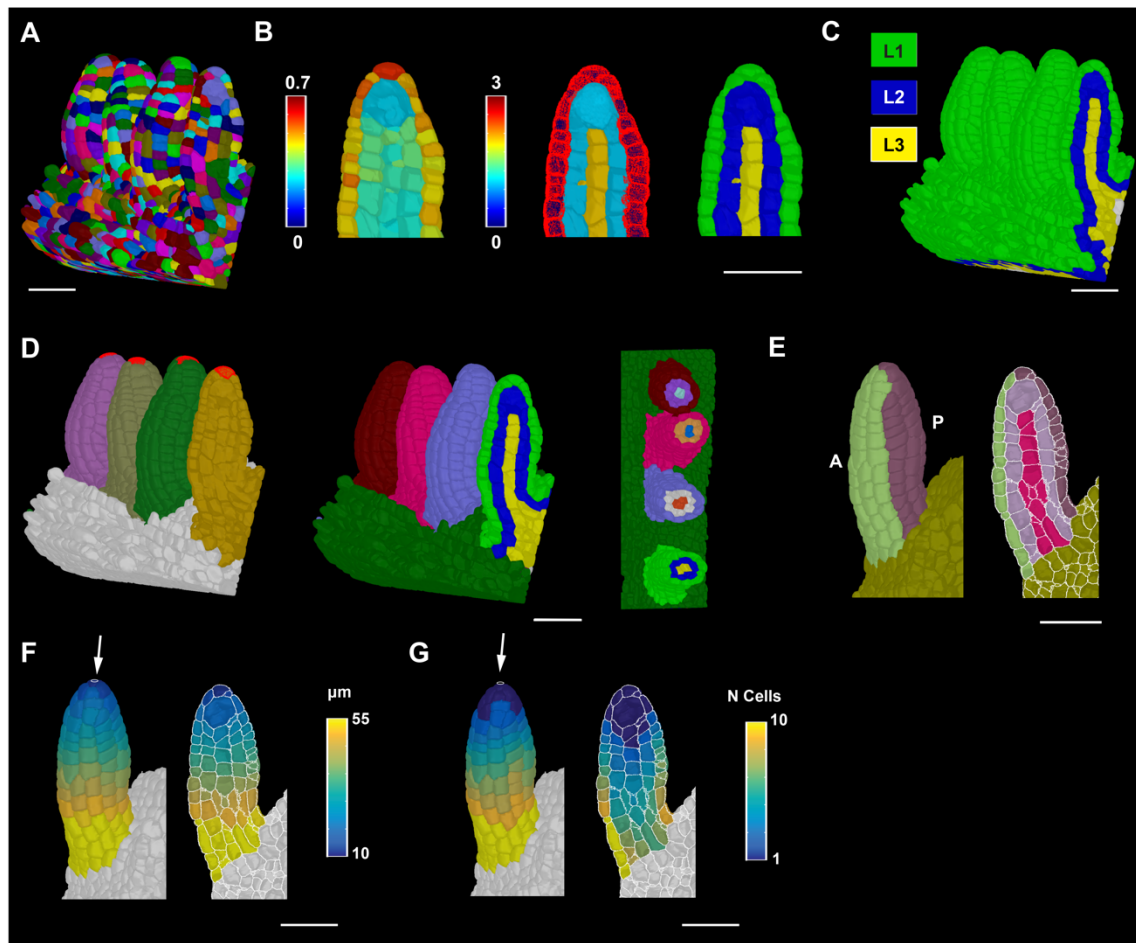

884

885 **Fig 3. Ovule primordium tissue detection and coordinate system.** (A) 3D segmented  
886 cell mesh view of a pistil fragment with four ovules of late stage 2-I. (B) Left panel:  
887 zoomed view of a sagittal section displaying the heatmap of outside wall area ratio.  
888 Threshold selection of outer surface cells based on the heatmap of outside wall area ratio.  
889 Center panel: heatmap indicates cell index, the number of cells an individual cell is  
890 separated from the selected outer surface cells marked in red. Right panel: heatmaps of  
891 cell distances (from center panel) were converted to integer values representing the tissue  
892 identity labels L1, L2 and L3. (C) Same method applied to the entire 3D mesh shown in  
893 (A). (D) Left panel: 3D Mesh view of the specimens shown in (A) with the distal most  
894 cell selected for organ separation. Center panel: colors on individual ovule primordia  
895 represent the results of organ separation after selecting the distal most cell and clustering  
896 the cell connectivity network. Result of the combination of L1, L2 and L3 label and organ

897 separated labels annotated for the ovules shown in (A). Right panel: transverse section  
898 displaying the L1, L2, L3 labels for different ovules in different colors. (E) Anterior and  
899 posterior labels added to the tissue-annotated ovule primordia 3D cell meshes. Left panel:  
900 surface view. Right panel: mid-sagittal section. (F) Heatmap of distance coordinates from  
901 the point-like origin at the distal end of the organ (white arrow). Heat values indicate the  
902 distance in  $\mu\text{m}$  from individual cells centroid to the Bezier ring (indicated by white arrow)  
903 of the coordinates in a tissue restricted manner. Left panel: 3D view. Right panel: sagittal  
904 section view. (G) Heatmap of cell coordinates instead of distance coordinates as in (F).  
905 Heat values indicate how many cells apart is a cell of interest from the origin of the  
906 coordinates through tissue-restricted manner. Left panel: 3D view. Right panel: sagittal  
907 section view. Scale bars: 20  $\mu\text{m}$ .  
908

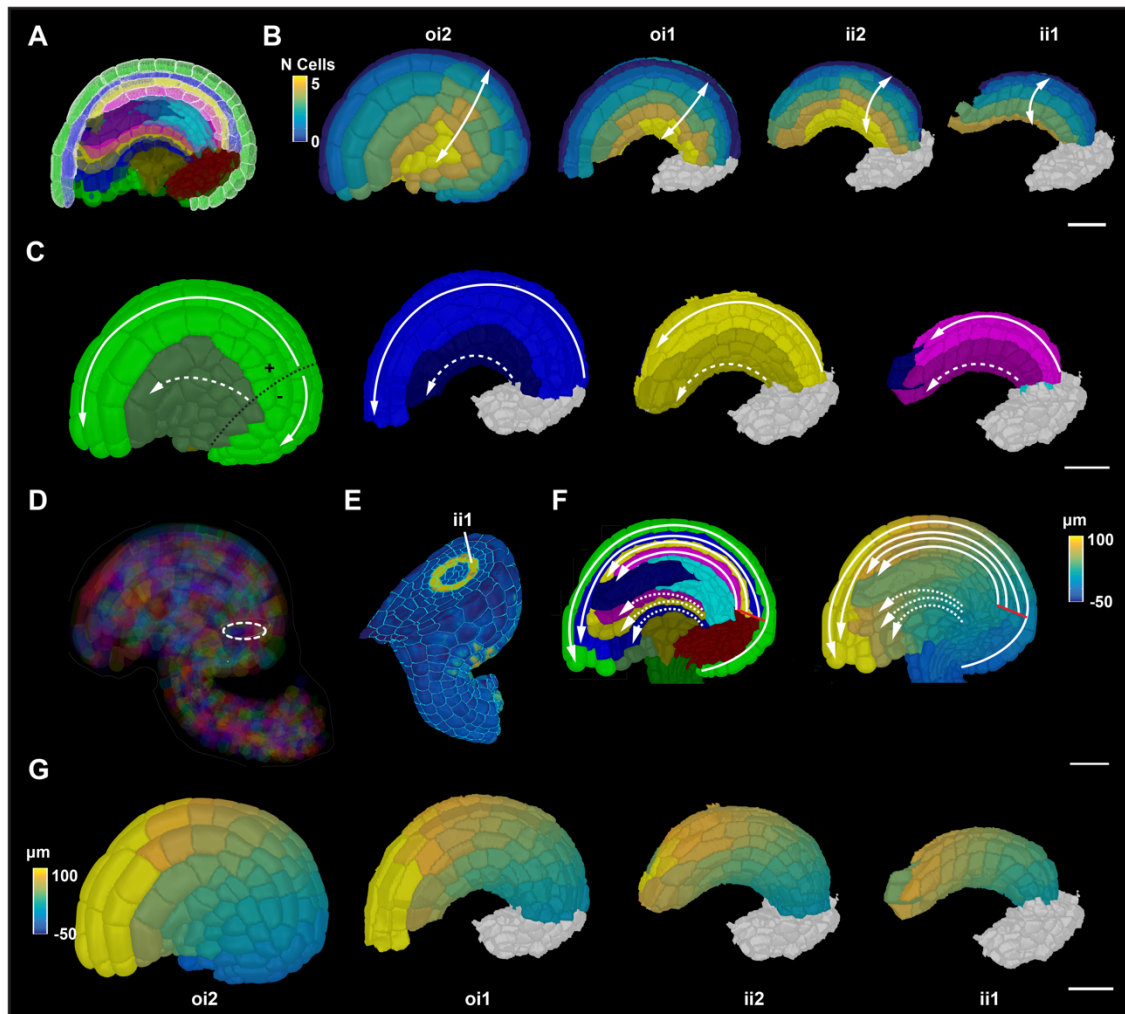

909

910 **Fig 4. Integument coordinate system.** (A) Mid-sagittal section highlighting the selected  
911 medial cells on the posterior side of the four layers of integument tissues for medial-  
912 lateral coordinate annotation. Colors represent tissue annotations similar to Fig. 1B. (B)  
913 Heatmap of medial-lateral cell coordinates. Heat values indicate the lateral position in  
914 terms of the number of cells from the median file of cells. Different integument tissues  
915 are extracted from the 3D mesh to display the medial-lateral coordinates at their tissue  
916 surface. (C) 3D surface view of integument tissues similar to (B). Medial and lateral cells  
917 are distinguished. Solid white line represents the tissue restricted coordinate direction  
918 along the medial group of cells. White dashed line represents the tissue restricted  
919 coordinate direction along the lateral group of cells. Black dotted line on oi2 represents  
920 the coordinate origin projected on the surface which separates the proximal oi2 cells with

921 negative coordinate values (D) Semi-transparent view of a mature 3D ovule displaying  
922 the coordinate origin as a ring inside the organ. (E) 3D clipping view of a transverse  
923 section of an ovule highlighting the ring-like expression of the pCUC3::CUC3:CFP  
924 reporter in yellow. (F) Left panel: sagittal section of a mature ovule displaying the  
925 coordinate directions of the medial and lateral group of cells in solid and white lines,  
926 respectively. Solid red line indicates the origin of the coordinate system. Right panel:  
927 Sagittal section displaying the heatmap of distance coordinates. Solid red line indicates  
928 the origin of the coordinate system. (G) 3D surface view of integument tissues similar to  
929 (B) displaying the distance coordinates at the surface of internal tissues. Scale bars: 20  
930  $\mu\text{m}$ .  
931



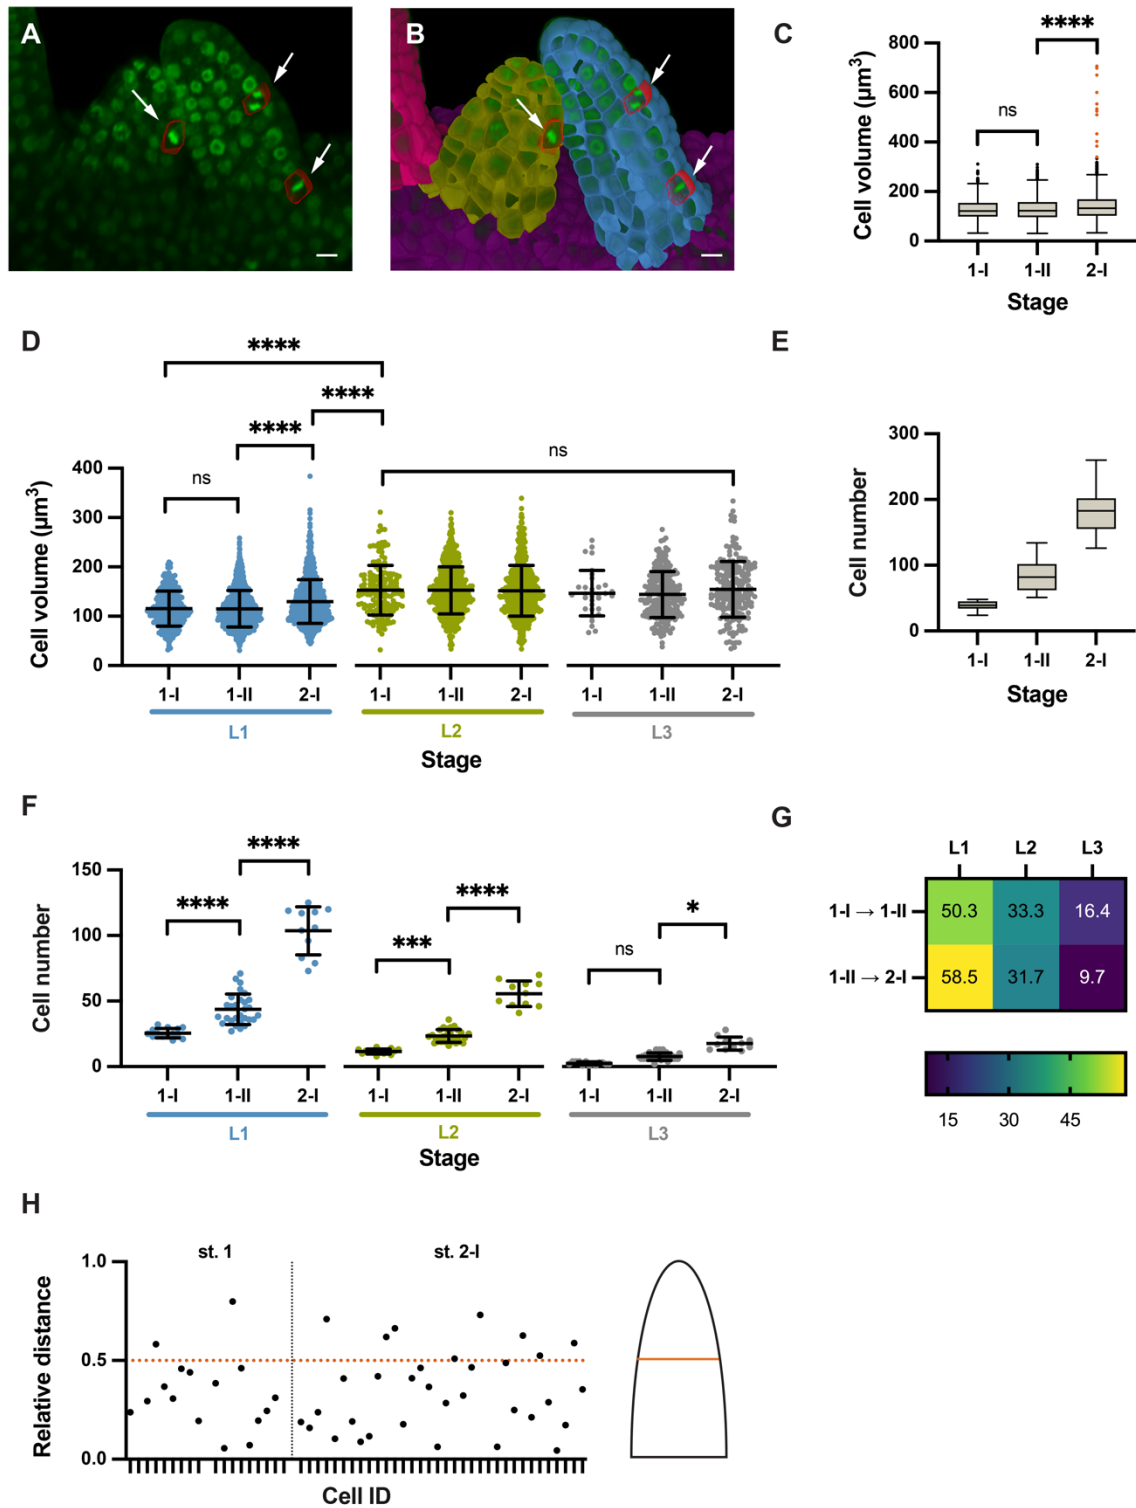

932

933 **Fig 5. Cellular growth patterns in the ovule primordium.** Different stages of wild-type

934 (Col-0) ovule primordia are analyzed. (A) 3D frontal plane view of ovule primordia

935 displaying the To-PRO-3 nuclear stain. Cells undergoing mitosis are outlined in red and

936 marked by arrows. (B) Same section in (A) with an overlay of 3D labelled meshes.

937 Arrows indicate mitotic figures (C) Comparison of cell volumes. Box and whiskers plots  
938 are shown. Whiskers extend to 1.5x the interquartile range from the 25 or 75 percentile,  
939 respectively (Tukey). (D) Comparison of cell volume between radial layers of different  
940 stages. (E) Comparison of cell numbers. Box and whiskers plots are shown. Whiskers  
941 extend to 1.5x the interquartile range from the 25 or 75 percentiles, respectively (Tukey).  
942 (F) Comparison of cell numbers between radial layers of different stages. (G) Heatmap of  
943 percentage increase in number of cells per tissue compared to overall increase in number  
944 of cells. (H) Plot showing the relative distance along the proximal-distal axis of mitotic  
945 cells in a primordium. Relative distance was calculated by the following formula:  $\text{reldist} = 1 - \text{distance coordinate}/\text{mean length}$ . The stages are indicated. Statistics in (D, F): data  
946 are mean  $\pm$  SD; significances: \*\*\*\*,  $p < 0.0001$ ; \*\*\*,  $p < 0.0004$ ; \*,  $p < 0.02$ . Ordinary  
947 one-way ANOVA followed by Tukey's multiple comparison test. Scale bars: 20  $\mu\text{m}$ .  
948  
949

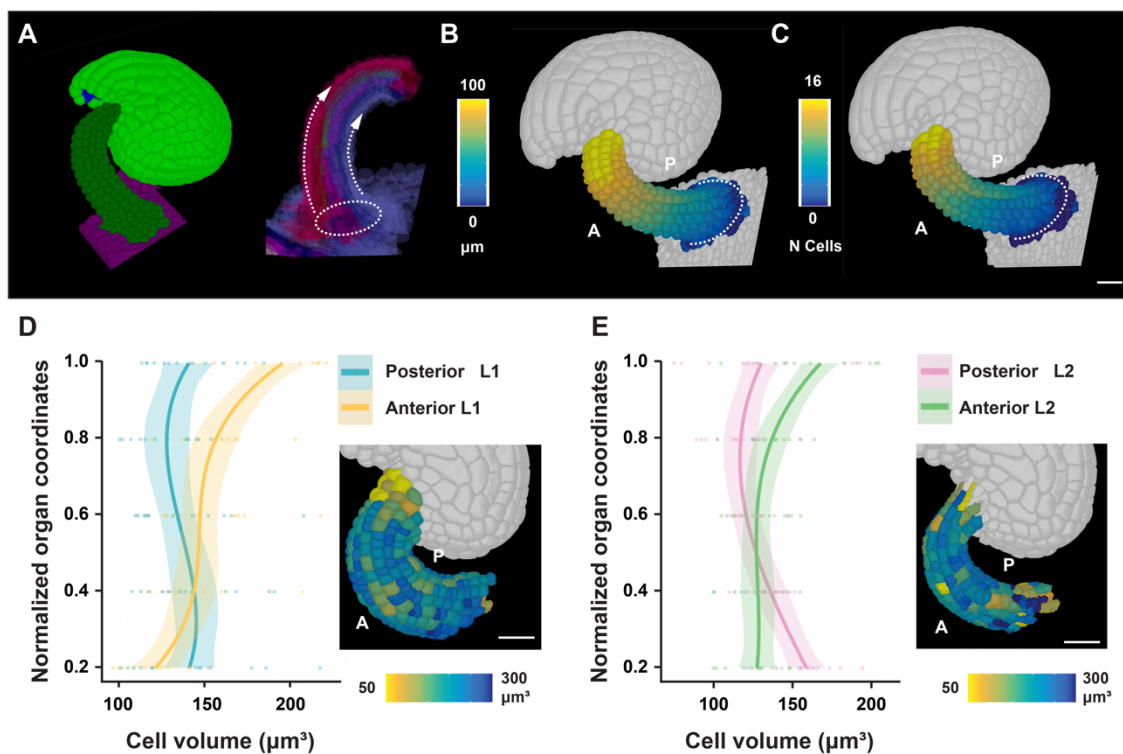

950



951 **Fig 6. Cellular features of funiculus curvature.** Wild-type (Col-0) ovules of stage 3-IV  
952 are analyzed. (A) Left panel: Tilted side-view of a 3D cell mesh. Right panel: Semi-  
953 transparent 3D mesh view of funiculus extracted from the 3D mesh of the organ. The  
954 Bezier ring serving as origin is placed at the proximal base of the funiculus. The dashed  
955 arrow lines indicate the coordinate direction along the anterior and posterior midlines.  
956 (B,C) Same specimen as in (A). The anterior and posterior sides are marked. (B) Heatmap  
957 of cell distances along the proximal-distal axis of the funiculus. (C) Heatmap of cell  
958 numbers along the proximal-distal axis of the funiculus. White dotted line indicates the  
959 coordinate origin as a ring. (D) Graph depicting cell volumes of anterior and posterior L1  
960 cells in relation to the normalized proximal-distal position. The inset in the bottom right  
961 corner shows a heat map of cell volume in the L1 of the funiculus. 14 3D digital ovules  
962 were analyzed. Regression curves are cubic polynomials with 95% confidence intervals  
963 (shaded regions). Number of cells:  $1568 \leq n \leq 1768$ . (E) Similar graph as in (D) revealing  
964 cell volumes of anterior and posterior L2 cells. Number of cells:  $1175 \leq n \leq 1352$ . Scale  
965 bars: 20  $\mu\text{m}$ .  
966

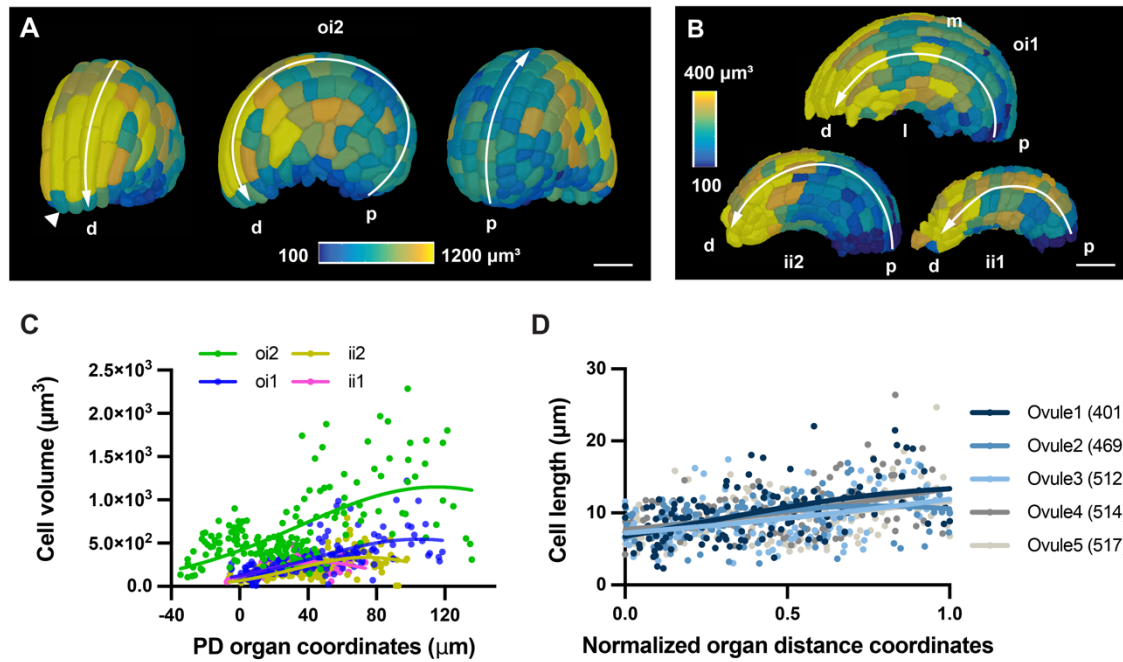

967

968 **Fig 7. 3D geometry of integument cells.** Wild-type (Col-0) ovules of stage 3-IV are  
969 analyzed. (A) Heatmap of oi2 cell volumes. Panels depict a tilted frontal view (left), side  
970 view (center), and tilted back view (right). The proximal-distal axis is indicated. The  
971 arrowhead marks a small tip cell. (B) Side views of the same specimen as in (A) showing  
972 the 3D surface view of internal tissues. Heatmaps of the oi1, ii2, and ii1 layers,  
973 respectively. (C) Graph showing cell volume in relation to proximal-distal distance for  
974 the four integument layers of a representative ovule. The respective nonlinear Gaussian  
975 regression curves are indicated.  $95 \leq n \leq 172$ . (D) Cell lengths in relation to normalized  
976 proximal-distal distance. Cells in the median oi1 layer of five ovules were analyzed. The  
977 respective nonlinear Gaussian regression curves are indicated.  $126 \leq n \leq 133$ . Note the  
978 increase in cell length towards the distal end. Abbreviations: d, distal; ii1, inner layer of  
979 inner integument; ii2, outer layer of inner integument; l, lateral; m, medial; oi1, inner  
980 layer of outer integument; oi2, outer layer of outer integument; p, proximal. Scale bars:  
981 (A,B) 20  $\mu\text{m}$ .

982

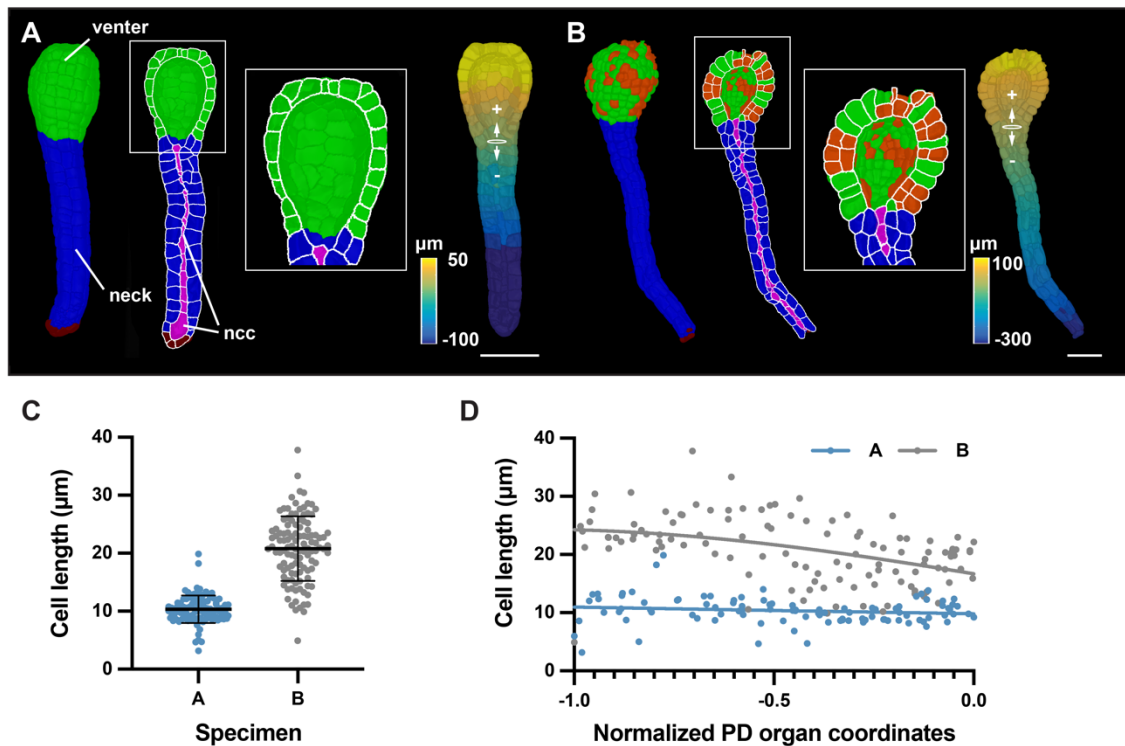

983

984 **Fig 8. Cellular analysis of 3D digital archegonia from *Marchantia*.** (A,B) 3D cell  
985 meshes of two different-stage archegonia are depicted. (A) Specimen A. The venter and  
986 neck are indicated. Left: 3D view. Center: An about mid-sagittal section. Right: Distance  
987 values along the central axis. The Bezier ring at the venter-neck boundary, which serves  
988 as the origin of the coordinate system, is indicated. (B) Specimen B. Identical  
989 arrangement as in (A). Highlighted white box represents the zoom view of the venter cells  
990 having undergone periclinal cell divisions marked in red. (C) Graph depicting the cell  
991 lengths of all neck cells of specimens A and B. The mean  $\pm$  SD is indicated. Specimen A:  
992 n = 98. Specimen B: n = 114. (D) Graph showing cell length of individual neck cells of  
993 the two specimens shown in (C) in relation to their normalized position along the long  
994 axis of the neck. The tip of the neck is oriented to the left (0.0 corresponds to the ring  
995 position, the tip of the neck is at position -1.0, compare with Fig. 8B). Abbreviations: ncc,  
996 neck canal cells. Scale bars: (A,B) 50  $\mu\text{m}$ .

997

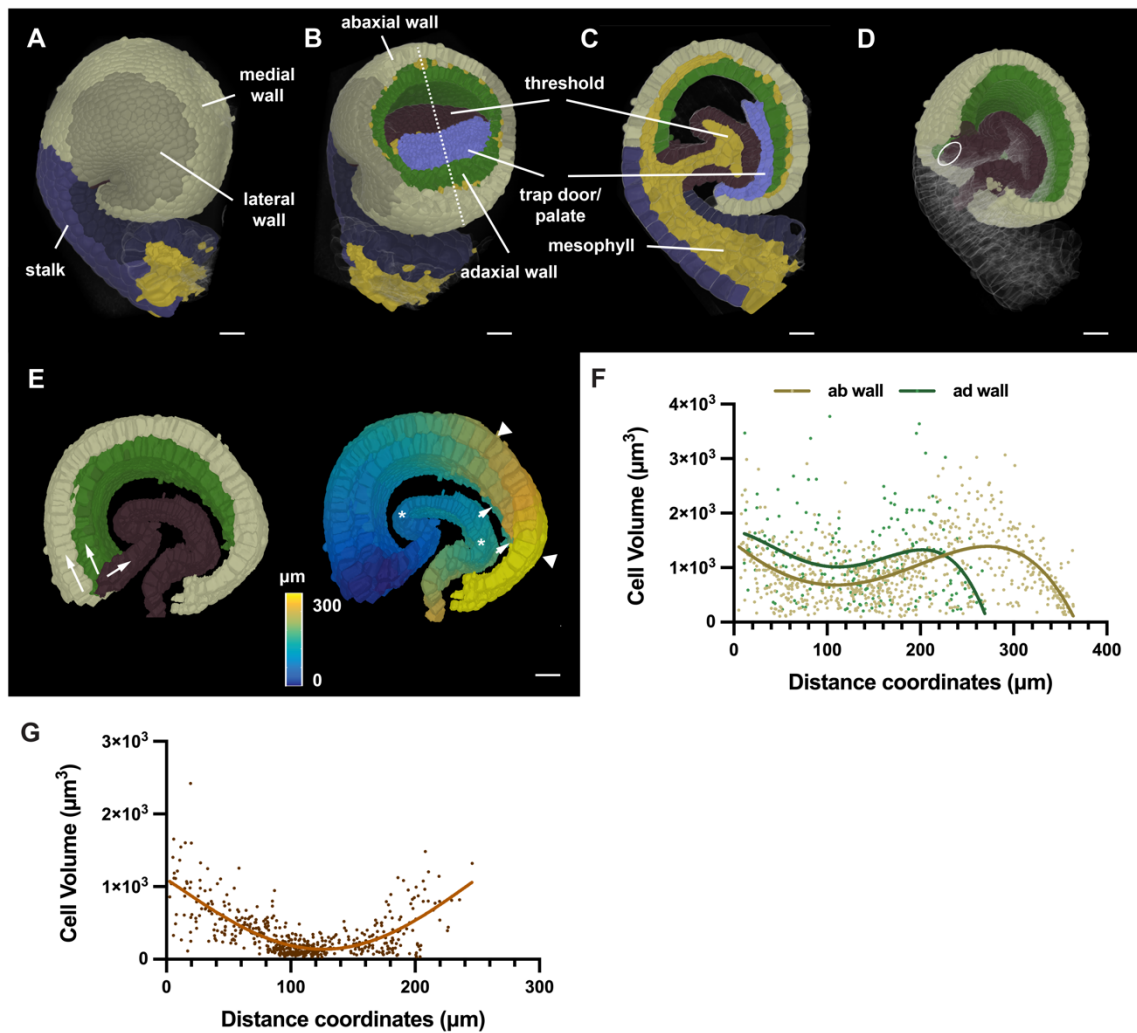

998

999 **Fig 9. 3D digital Utricularia trap.** A specimen 6 days after initiation is shown. (A) Side

1000 view of the 3D cell mesh with annotation of various tissues. (B) Tilted view of (A) with

1001 part of the wall removed by a tangential clipping plane. The dashed line indicates the

1002 mid-sagittal section shown in (C). (C) Mid-sagittal section. (D) Slanted 3D view of (A)

1003 with half of the trap cut off at the mid-sagittal plane shown in (B). The trap door and

1004 palate domain were removed. The position of the Bezier ellipsoid is indicated. (E) Left

1005 panel: arrows indicate the direction of the distance coordinates through the epidermis of

1006 the abaxial and adaxial tissue of the wall and the threshold, respectively. Right panel:

1007 Heat map indicating distances. Wall and threshold are treated separately. Triangles mark

1008 the 240-320  $\mu\text{m}$  interval of the abaxial wall. Arrows highlight the tapering end of the

1009 adaxial wall. Asterisks indicate the 80-150  $\mu\text{m}$  interval of the threshold. (F) Graph

1010 displaying cell volume of epidermal trap cells in relation to their position. Values for the  
1011 abaxial and adaxial wall are superimposed. The respective nonlinear regression curves  
1012 fitting a fourth order polynomial function are indicated. ab wall: n = 786, ad wall: n =  
1013 231. (G). Graph displaying cell volume of threshold cells in relation to their position. The  
1014 line marks a nonlinear regression curve. n = 533. Scale bars: 20  $\mu\text{m}$ .  
1015

## 1016 Tables

1017 **Table 1. Layer-specific cellular growth characteristics in the ovule primordium**

| Cell layer | Stage <sup>a</sup> |                          |                 |                          |                  |                          |
|------------|--------------------|--------------------------|-----------------|--------------------------|------------------|--------------------------|
|            | I-I                |                          | 1-II            |                          | 2-I              |                          |
|            | Cell number        | Cell volume <sup>b</sup> | Cell number     | Cell volume <sup>b</sup> | Cell number      | Cell volume <sup>b</sup> |
| L1         | 25.6 $\pm$ 3.7     | 115.6 $\pm$ 35.7         | 43.8 $\pm$ 11.6 | 115.2 $\pm$ 36.8         | 103.6 $\pm$ 18.4 | 129.9 $\pm$ 44.5         |
| L2         | 11.6 $\pm$ 1.9     | 152.8 $\pm$ 50.3         | 23.4 $\pm$ 4.9  | 152.7 $\pm$ 47.6         | 55.6 $\pm$ 9.7   | 158.5 $\pm$ 74.2         |
| L3         | 2.5 $\pm$ 1.2      | 146.8 $\pm$ 45.9         | 7.7 $\pm$ 2.8   | 144.1 $\pm$ 46.6         | 17.6 $\pm$ 5.0   | 154.7 $\pm$ 56.5         |

1018 <sup>a</sup>Number of 3D digital ovules scored: 14 (stage 1-I), 28 (stage 1-II), 11 (stage 2-I).

1019 <sup>b</sup>Volumes are given in  $\mu\text{m}^3$ .

1020 Values represent mean  $\pm$  SD

## The annotation and analysis of complex 3D plant organs using 3DCordX

Athul Vijayan<sup>1,#a,¶</sup>, Soeren Strauss<sup>2,¶</sup>, Rachele Tofanelli<sup>1</sup>, Tejasvinee Atul Mody<sup>1</sup>,  
Karen Lee<sup>3</sup>, Miltos Tsiantis<sup>2</sup>, Richard S. Smith<sup>2,3</sup> and Kay Schneitz<sup>1,\*</sup>

<sup>1</sup>Plant Developmental Biology, TUM School of Life Sciences, Technical University of Munich, Freising, Germany

<sup>2</sup>Department of Comparative Developmental and Genetics, Max Planck Institute for Plant Breeding Research, Cologne, Germany

<sup>3</sup>The John Innes Centre, Norwich Research Park, Norwich, United Kingdom

<sup>#a</sup>Current address

Department of Comparative Developmental and Genetics, Max Planck Institute for Plant Breeding Research, Cologne, Germany

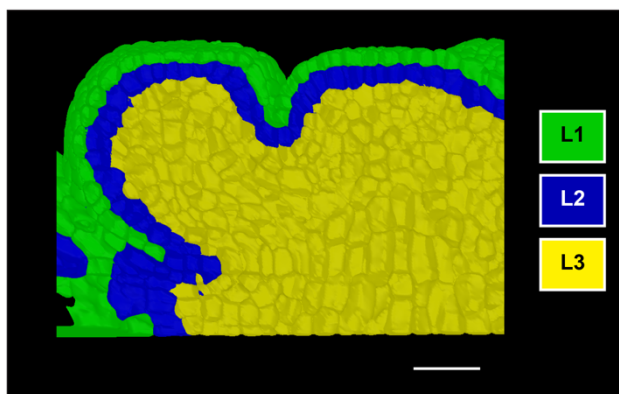

**Fig S1. Automatic cell layer detection in the Arabidopsis shoot apical meristem.** The outside wall area ratio approach was applied to automatically identify the three tissue layers. Layers are labelled with respective colors. Scale bar 20  $\mu\text{m}$ .

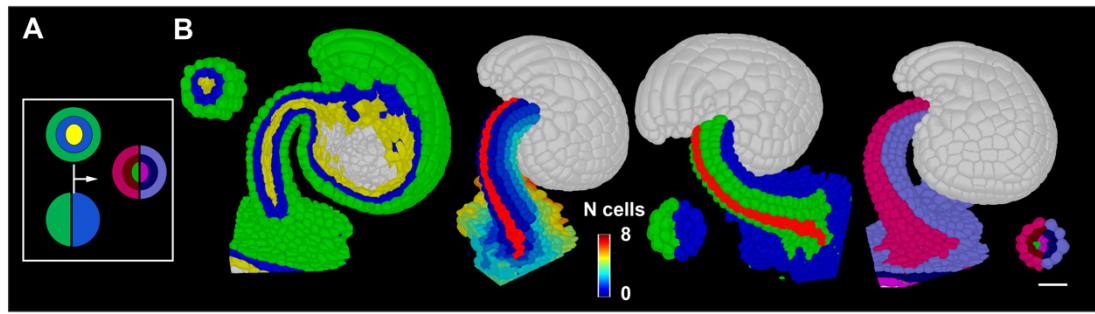

**Fig. S2. Separation of funiculus into radial and anterior and posterior domains.** A cartoon demonstrating the principle for the separation into radial L1, L2, L3 layers and anterior-posterior domains. (A) Results of L1, L2 and L3 tissue labels are combined with anterior and posterior labels to form the final tissue labels that separate individual radial layers and anterior-posterior tissues. (B) Figure demonstrating the step-by-step procedure for the detection of the anterior and posterior regions of the Arabidopsis funiculus. From left to right; first panel: L1, L2 and L3 labelled Arabidopsis ovule, a transverse section is shown at the top left; second panel: cells at roughly anterior midline are selected as origin (highlighted in red) and cell distance from these cells to other cells in funiculus are computed. Essentially the cell distance here represents the number of cells a cell is away from the anterior midline cells; third panel: the heatmap of cell distances from the second image is binned into two resulting in anterior and posterior tissue annotations; fourth panel: the results from first and third panel are merged to form the final tissue label that combines the information for L1, L2, L3 and anterior and posterior. This allows for example the distinction of anterior L1 and posterior L1 tissue. Scale bar 20  $\mu\text{m}$ .
